# Supplementary material
Source: ML conference proceedings conference paper supplement (https://openaccess.thecvf.com/content/WACV2024/html/Park_Fully-Automatic_Reflection_Removal_WACV_2024_paper.html)
Supplement: Supplementary file 1 [file Park_Fully-Automatic_Reflection_Removal_WACV_2024_supplemental.pdf]

# Supplementary material on Fully-Automatic Reflection Removal for 360-Degree Images

Jonghyuk Park, Hyeona Kim, Eunpil Park, and Jae-Young Sim\*  
Ulsan National Institute of Science and Technology, Ulsan, Republic of Korea  
{jonghyukpark, gusdk304, cosmos, jysim}@unist.ac.kr

## 1. Architecture Details

Figure S-1 shows the detailed architecture of the proposed network composed of the four encoding stages, one bottleneck stage and four decoding stages. From stage 1 to stage 9, the numbers of the transformer blocks and the attention heads in each block are (1, 2, 8, 8, 2, 8, 8, 2, 1), and (1, 2, 4, 8, 16, 16, 8, 4, 2), respectively.

## 2. More Results of the Proposed Method

Figures S-2~S-21 show more qualitative results of reflection removal obtained by the proposed method. We tested 60 real 360-degree images with reflection artifacts captured in various scenarios including the test images from [1]. We visualize the residual map between the input and output images, as well as the attention maps highlighting the mixed region  $\mathcal{M}$  and the reference region  $\mathcal{R}$ . We see that the proposed method detects the mixed and reference regions well, and removes the reflection artifacts in  $\mathcal{M}$  faithfully, as shown in Figures S-2~S-19. However, in some challenging cases (Figures S-20, S-21), the performance of reflection removal is somewhat degraded.

Table S-1 shows a comparison with state-of-the-art methods in terms of network complexities and parameters. While the proposed method has  $\sim 20\%$  GMACs of ERRNet [3] and  $\sim 74\%$  parameters of ABS [4], we provide much better performance as shown in Sec. 4.2 in main paper.

| Metric   | Methods    |           |         |           |         |
|----------|------------|-----------|---------|-----------|---------|
|          | ERRNet [3] | IBCLN [2] | ABS [4] | ZS360 [1] | Ours    |
| GMACs    | 836.92G    | 130.92G   | 117.55G | 159.27G   | 171.75G |
| # Params | 18.58M     | 6.08M     | 68.45M  | 0.60M     | 51.12M  |

Table S-1. Comparison of network complexities and parameters

## References

[1] Byeong-Ju Han and Jae-Young Sim. Zero-shot learning for reflection removal of single 360-degree image. In *ECCV*, pages 533–548. Springer, 2022.

[2] Chao Li, Yixiao Yang, Kun He, Stephen Lin, and John E Hopcroft. Single image reflection removal through cascaded refinement. In *CVPR*, pages 3565–3574, 2020.

[3] Kaixuan Wei, Jiaolong Yang, Ying Fu, David Wipf, and Hua Huang. Single image reflection removal exploiting misaligned training data and network enhancements. In *CVPR*, pages 8178–8187, 2019.

[4] Qian Zheng, Boxin Shi, Jinnan Chen, Xudong Jiang, Ling-Yu Duan, and Alex C Kot. Single image reflection removal with absorption effect. In *CVPR*, pages 13395–13404, 2021.

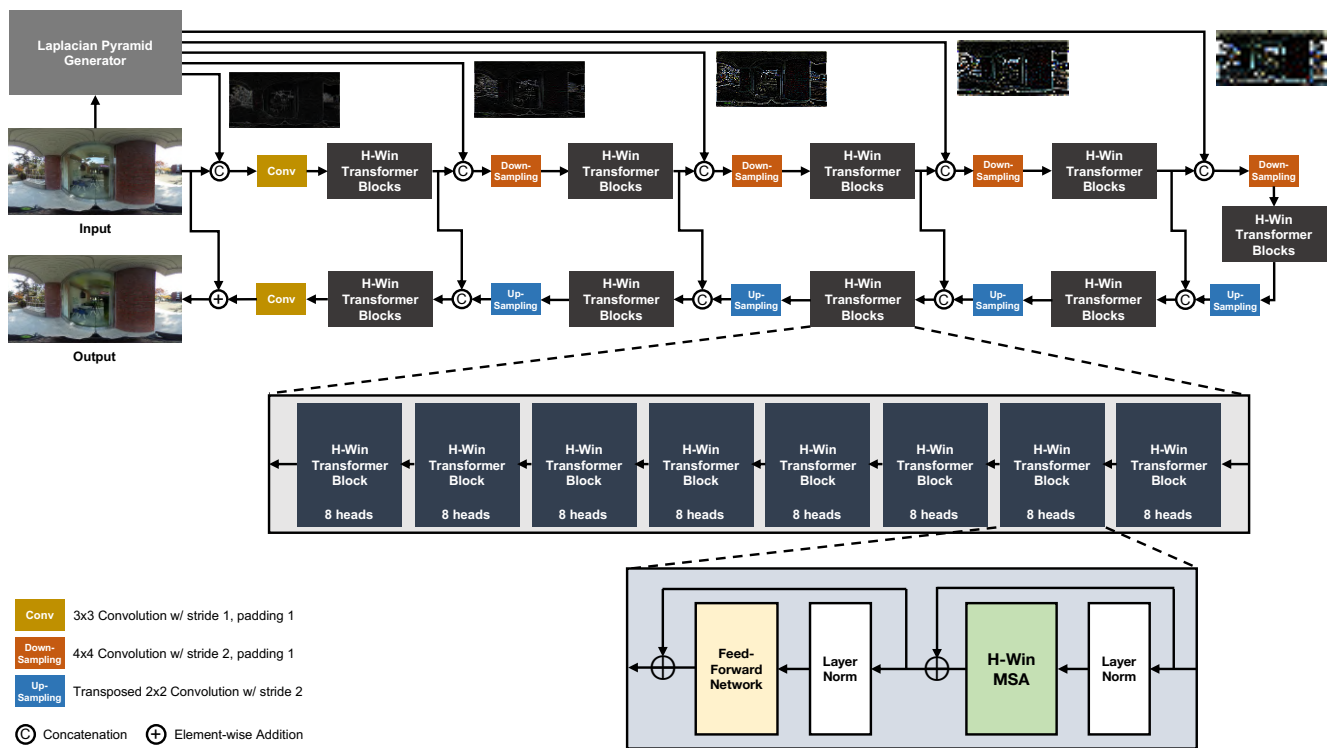

Figure S-1. Detailed architecture of the proposed network.

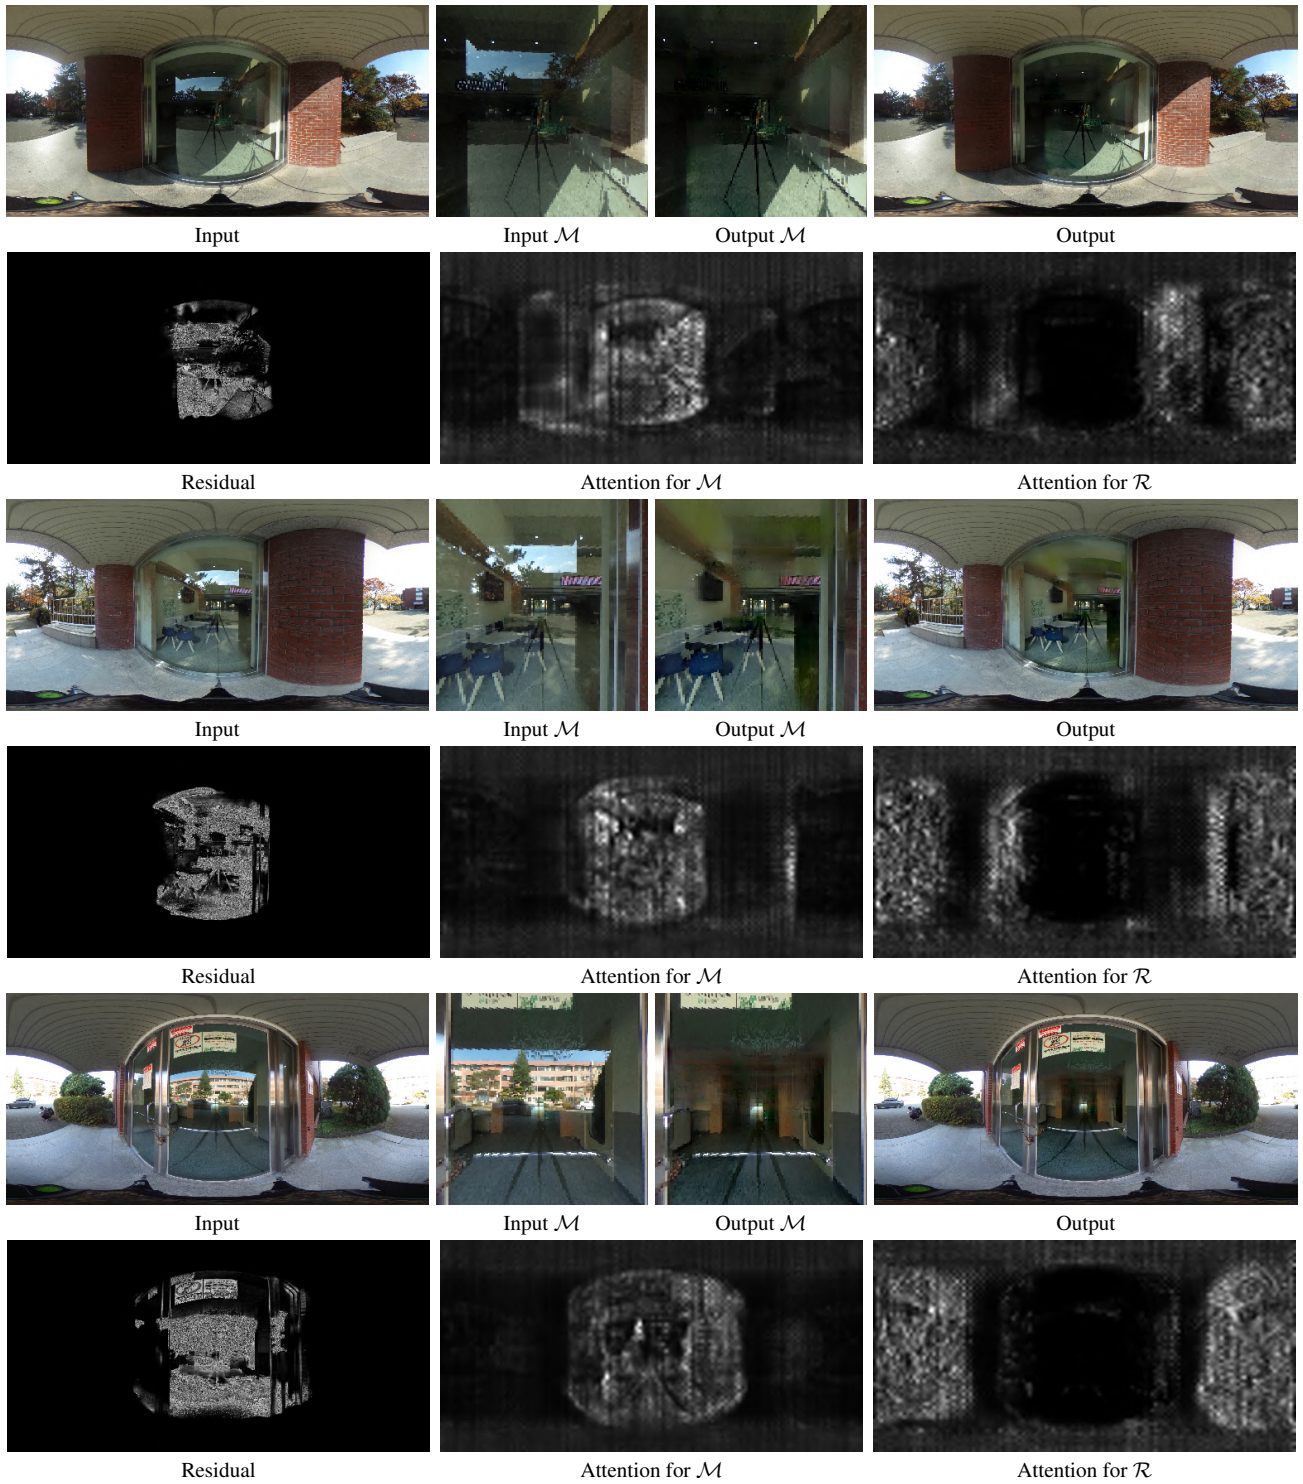

Figure S-2. Qualitative results of the proposed method.



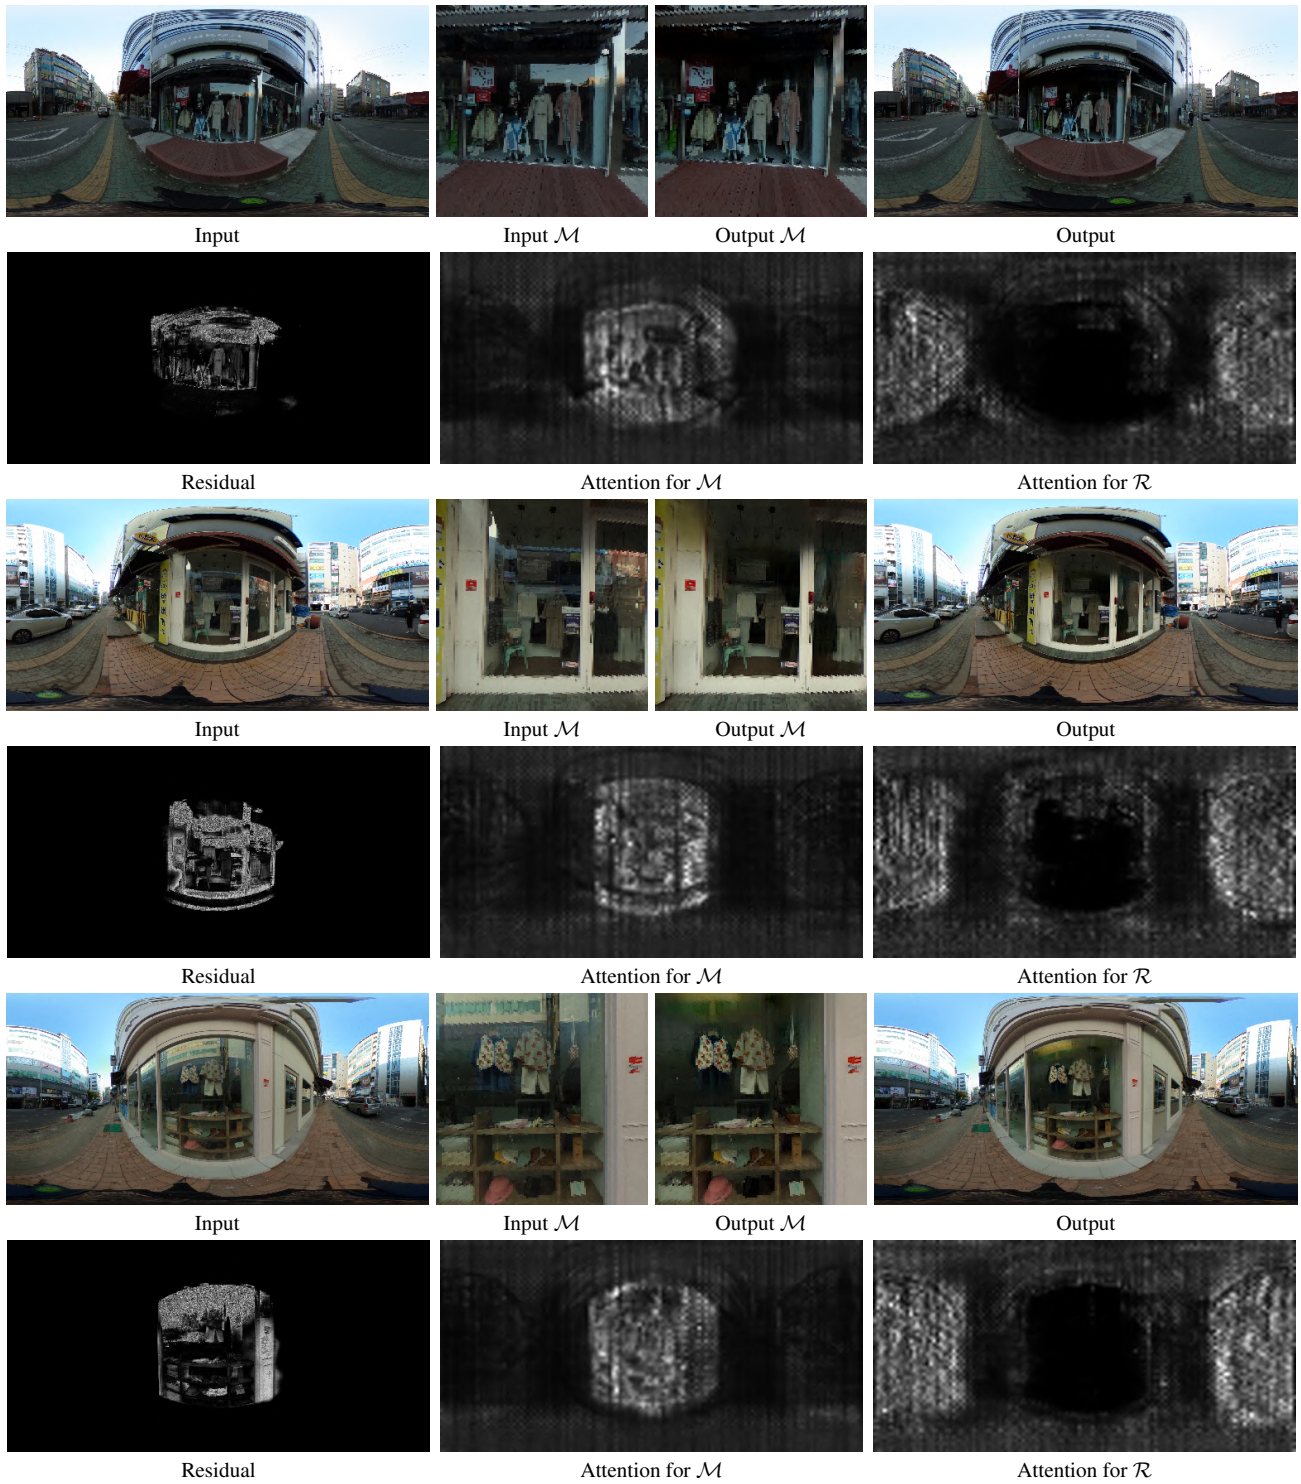

Figure S-3. Qualitative results of the proposed method.

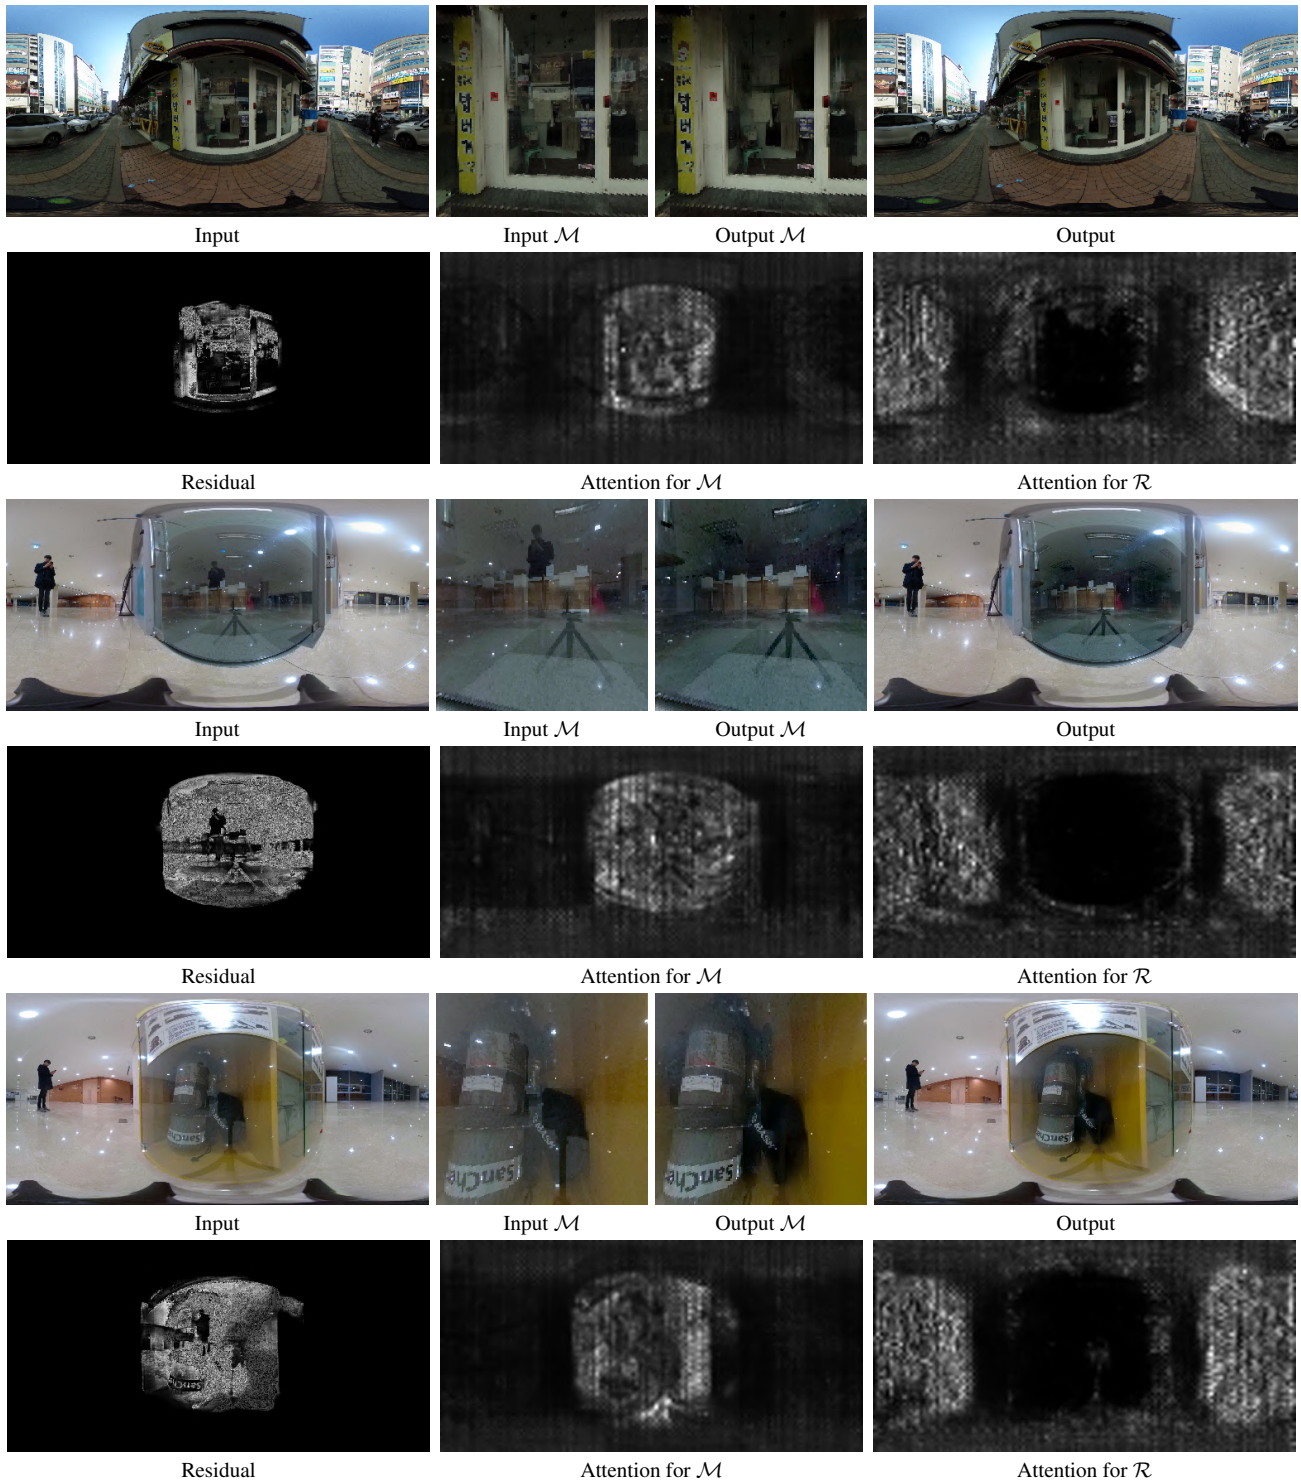

Figure S-4. Qualitative results of the proposed method.



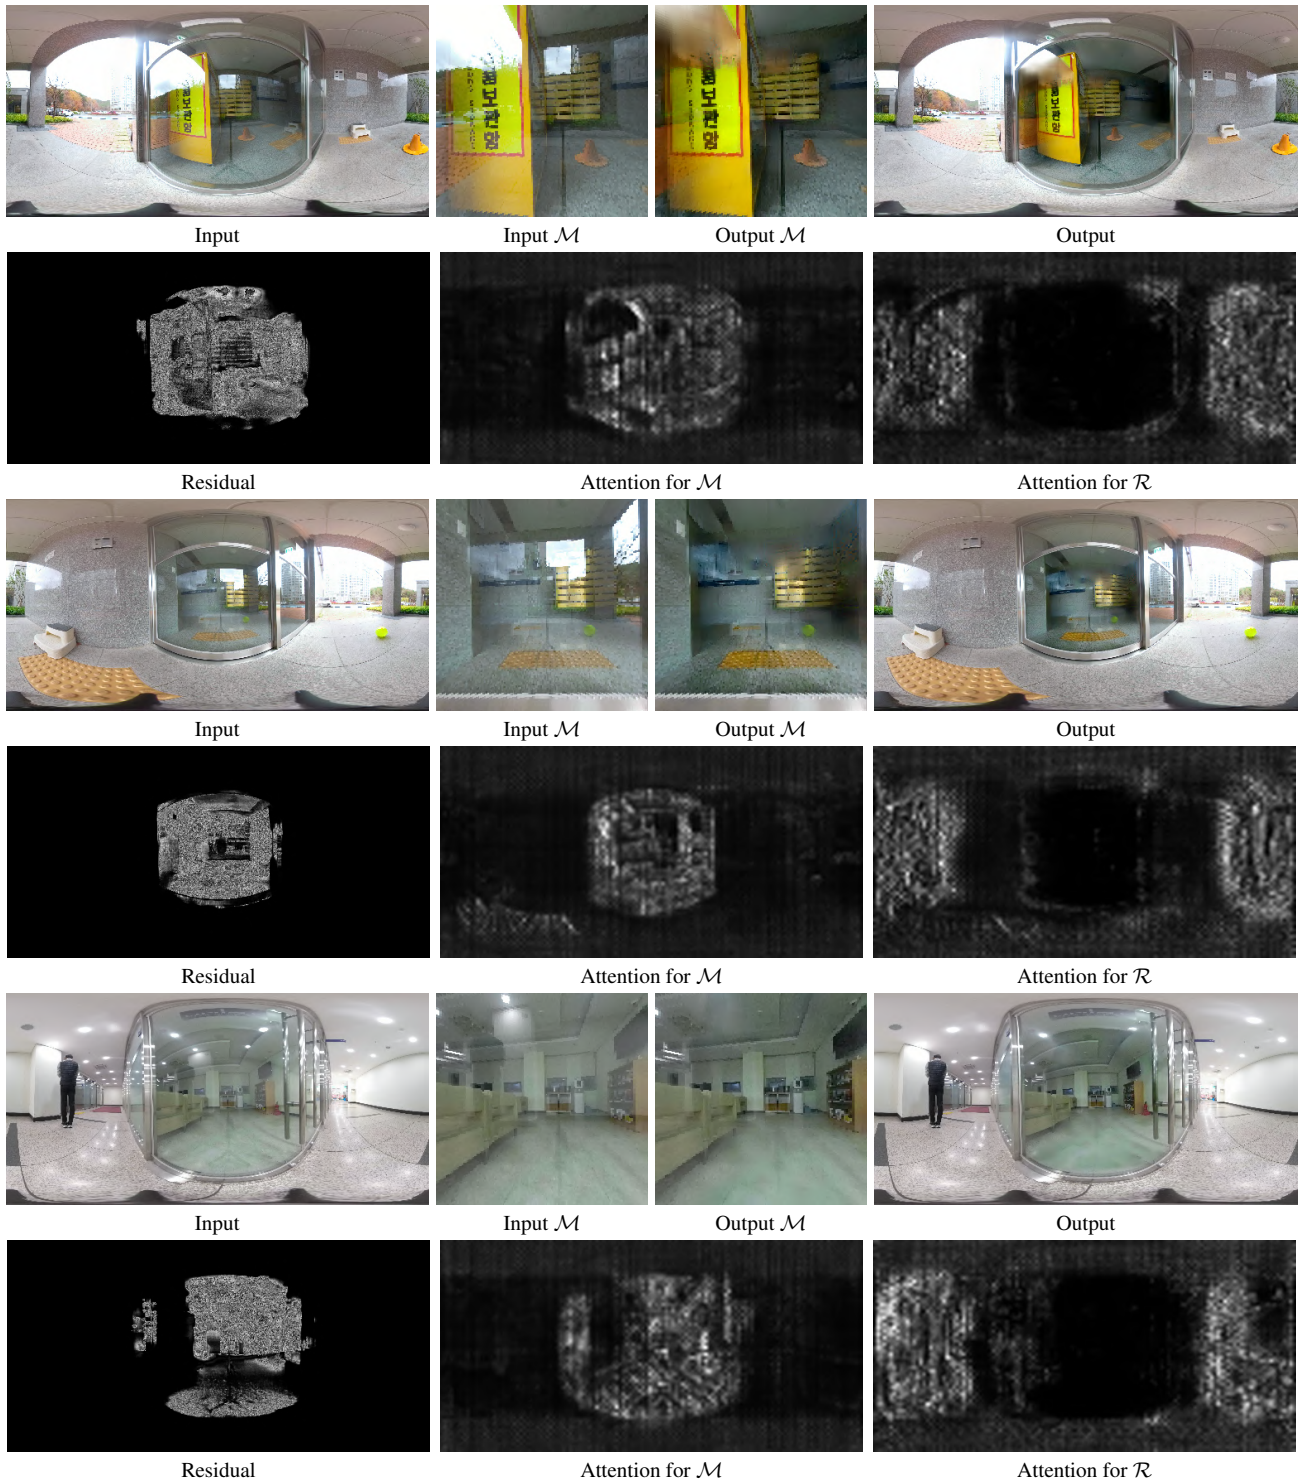

Figure S-5. Qualitative results of the proposed method.

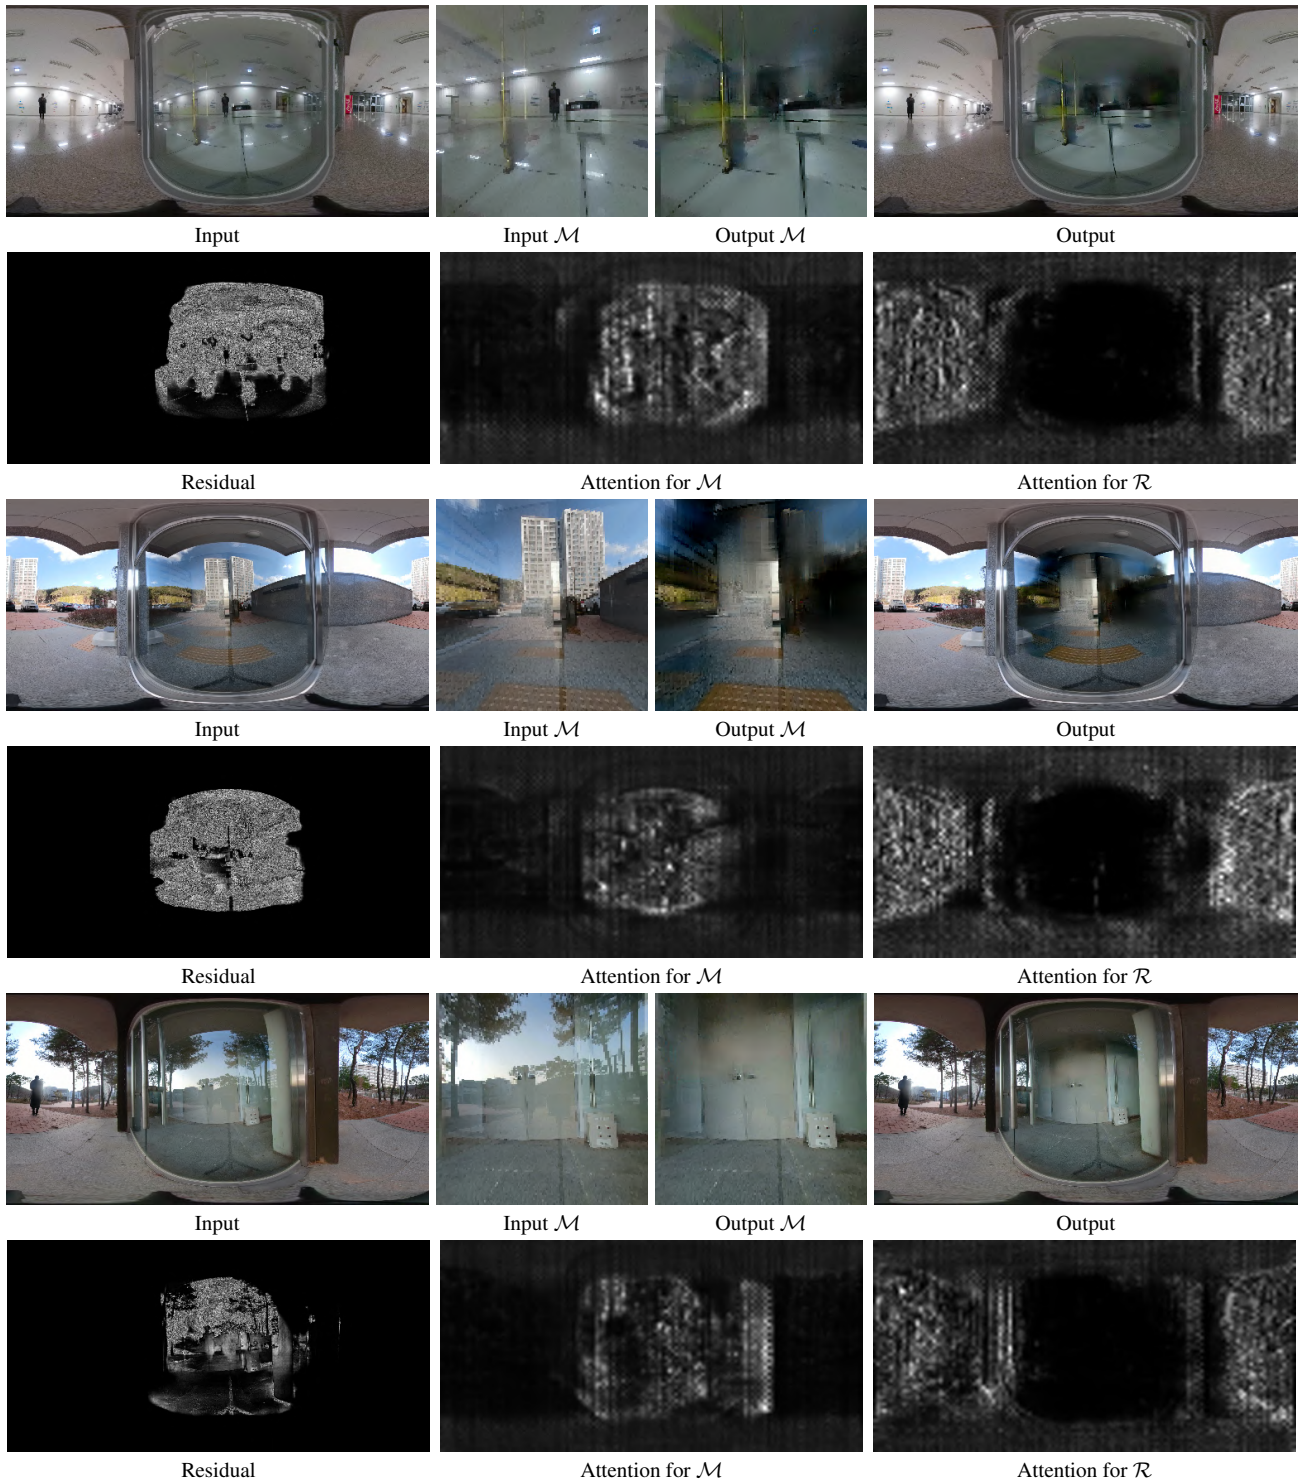

Figure S-6. Qualitative results of the proposed method.



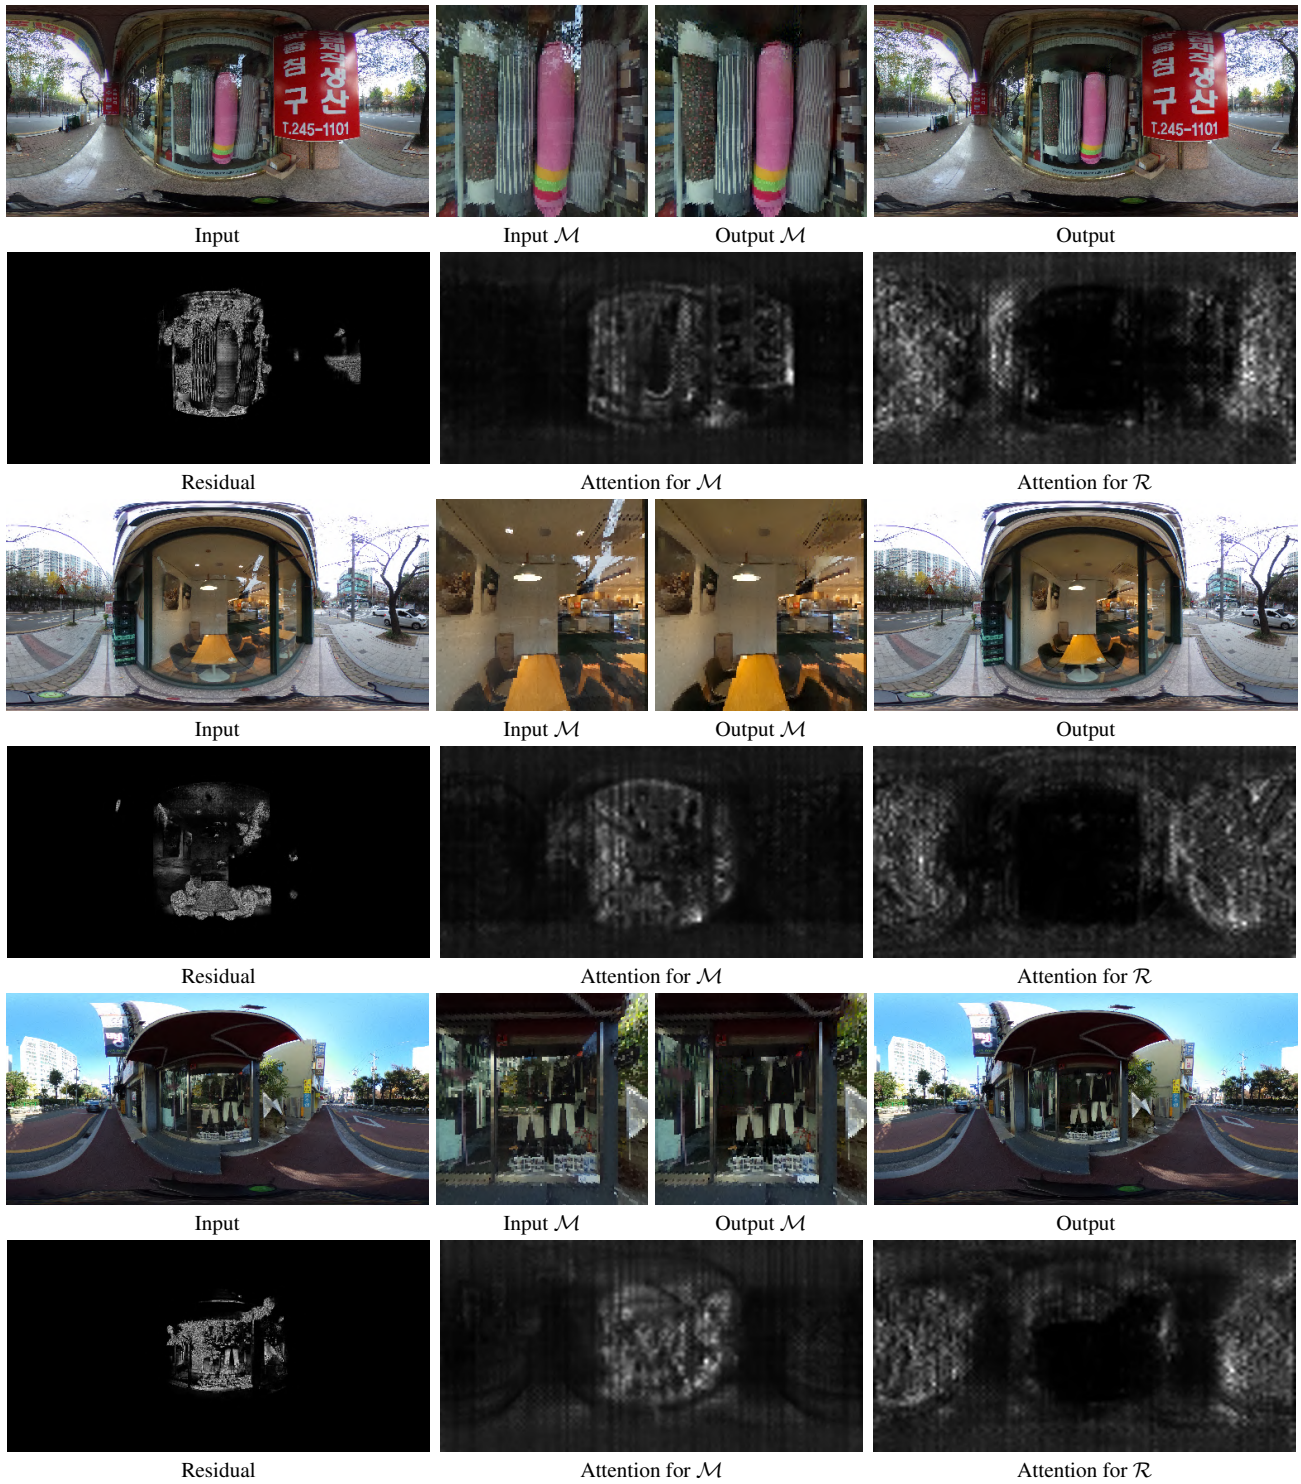

Figure S-7. Qualitative results of the proposed method.



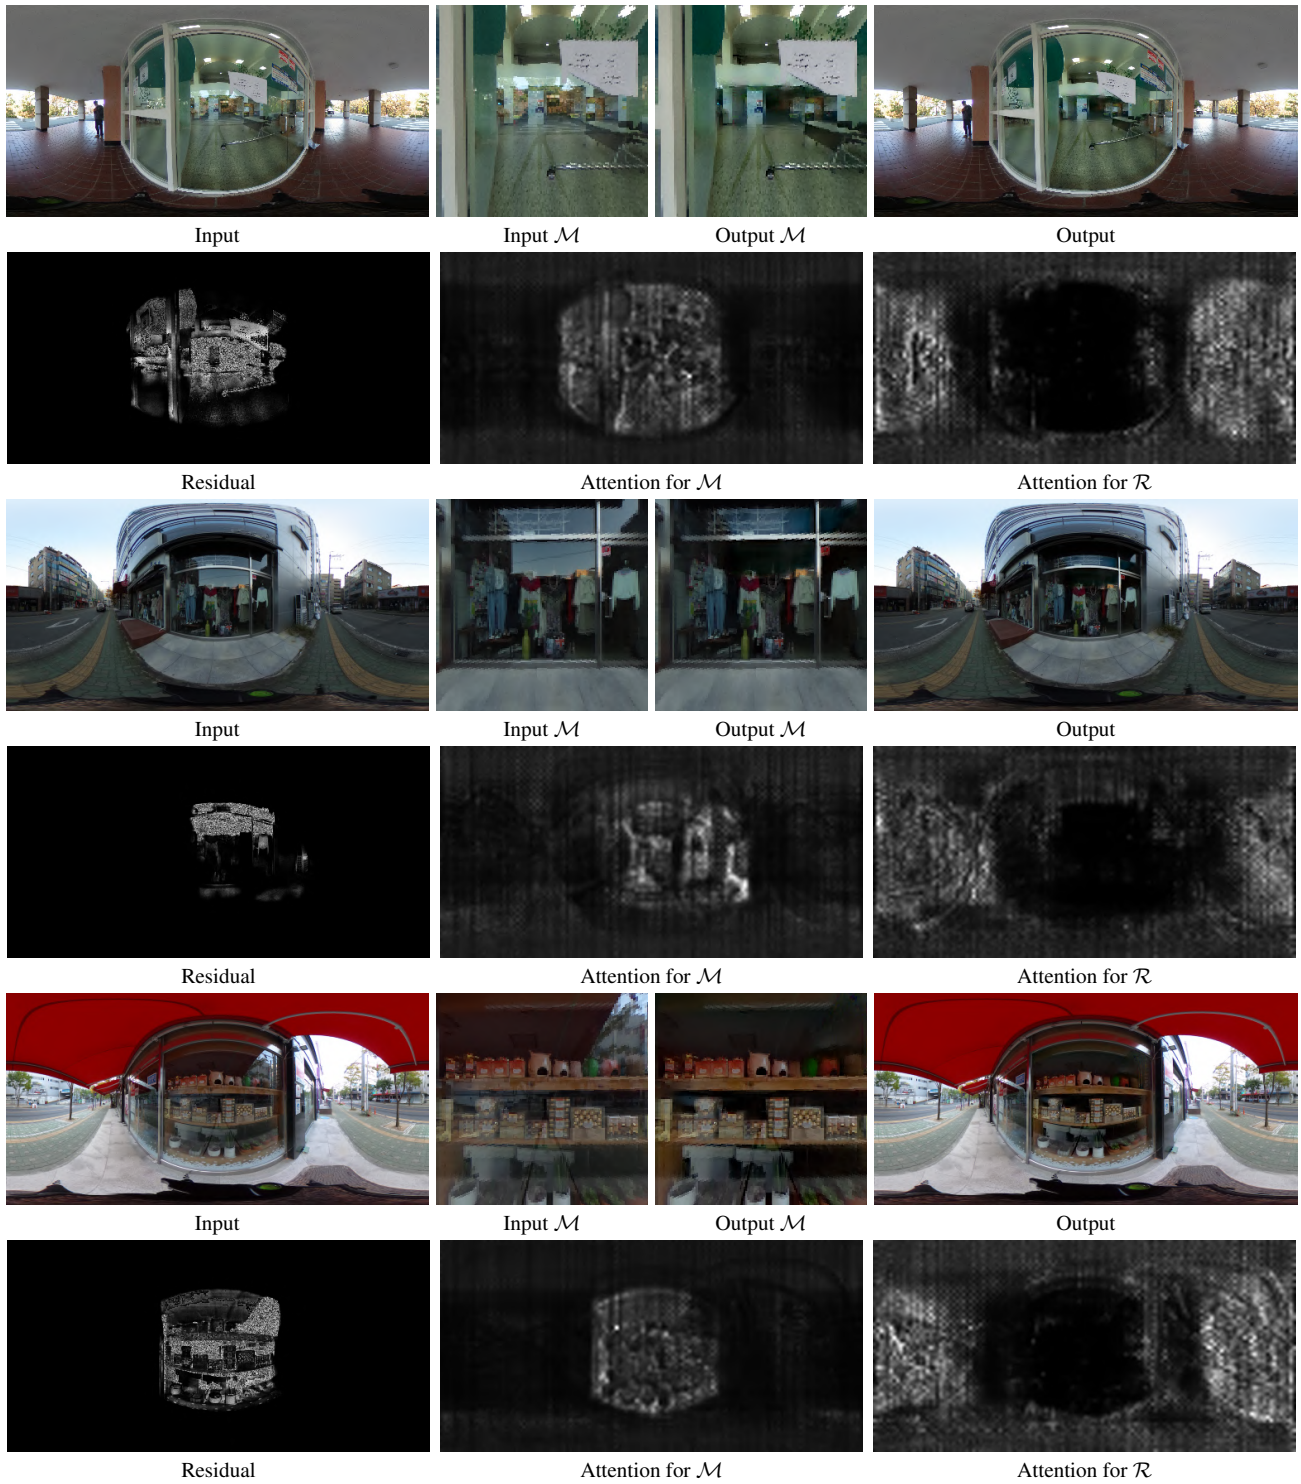

Figure S-8. Qualitative results of the proposed method.

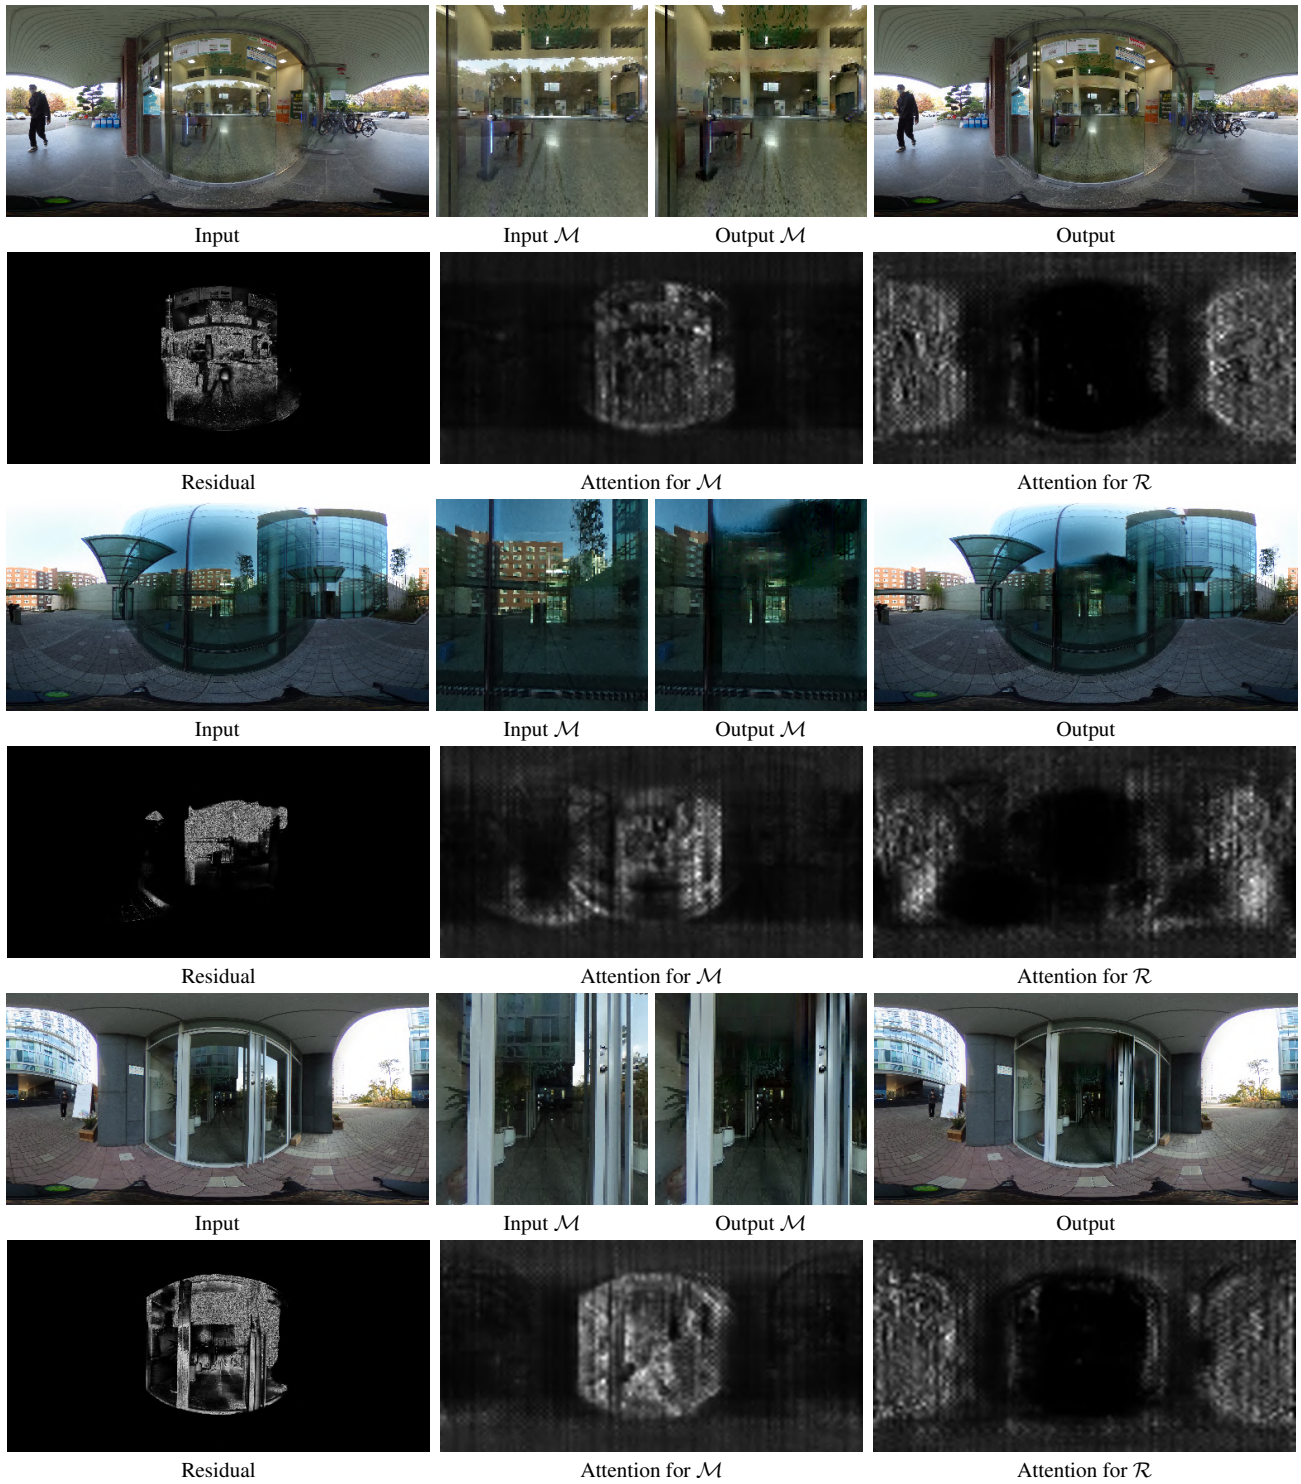

Figure S-9. Qualitative results of the proposed method.



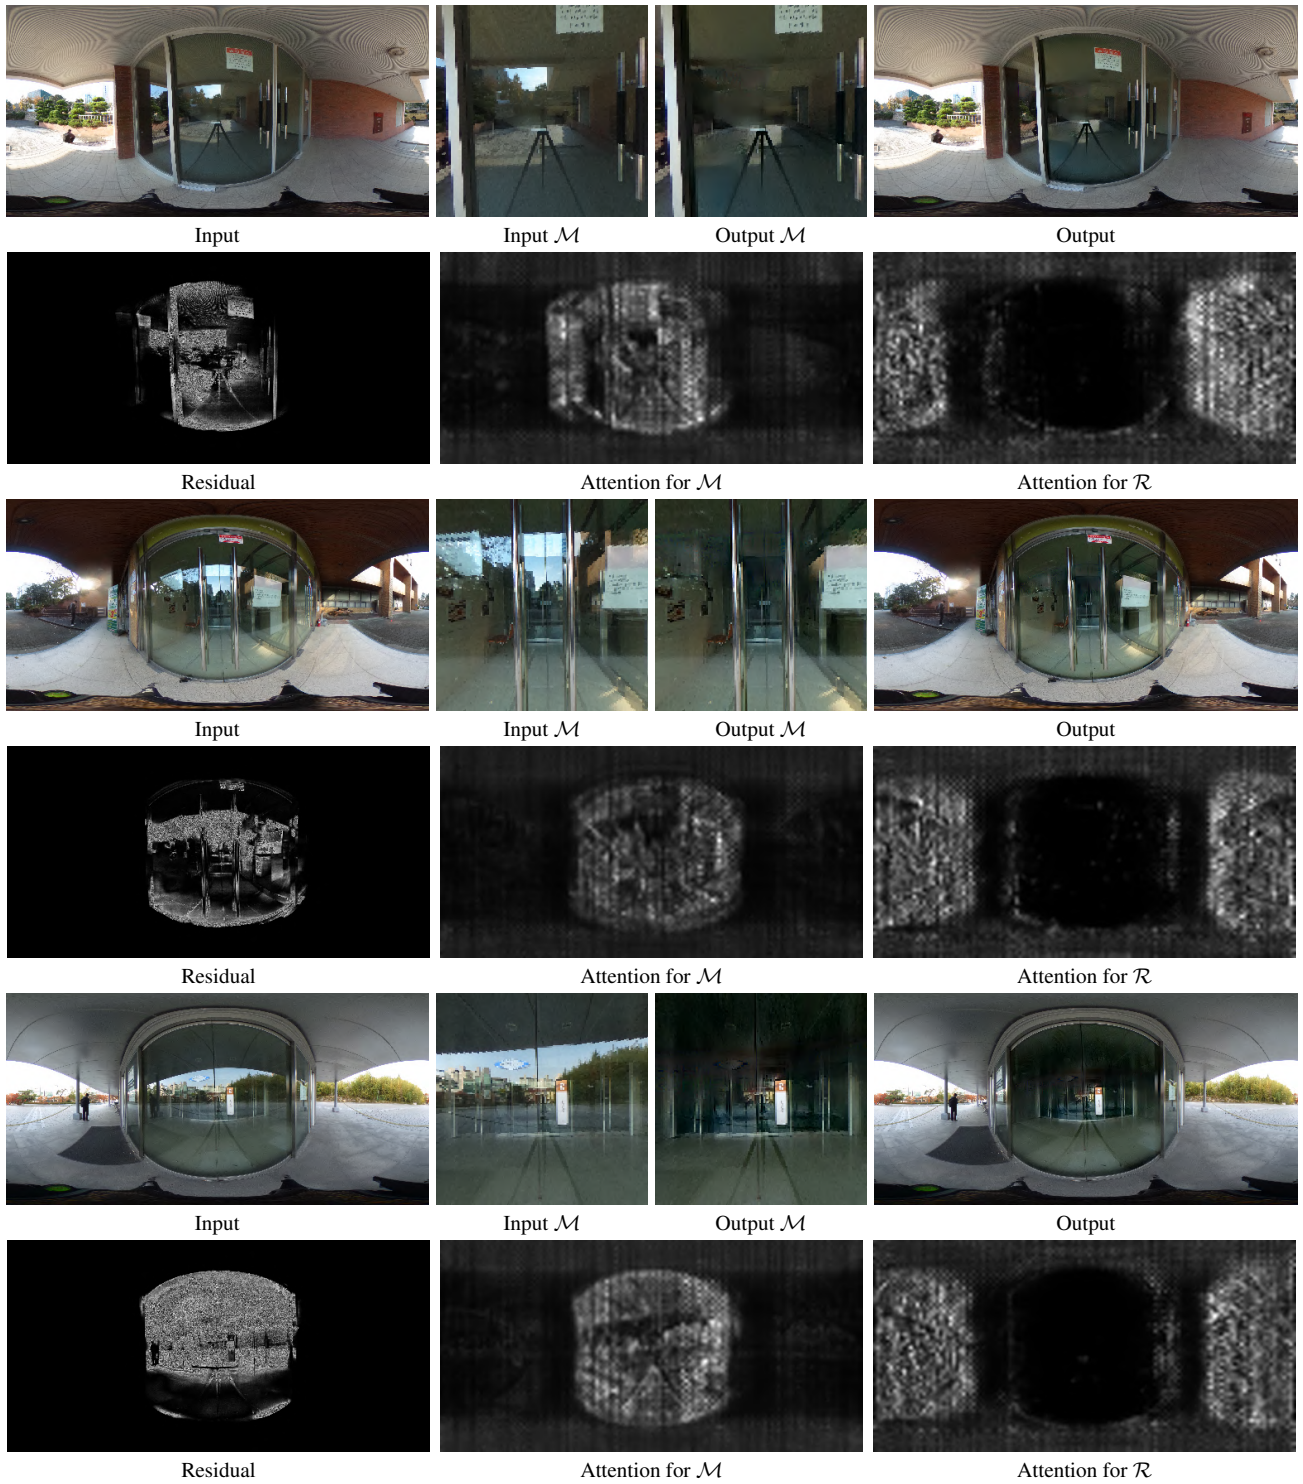

Figure S-10. Qualitative results of the proposed method.

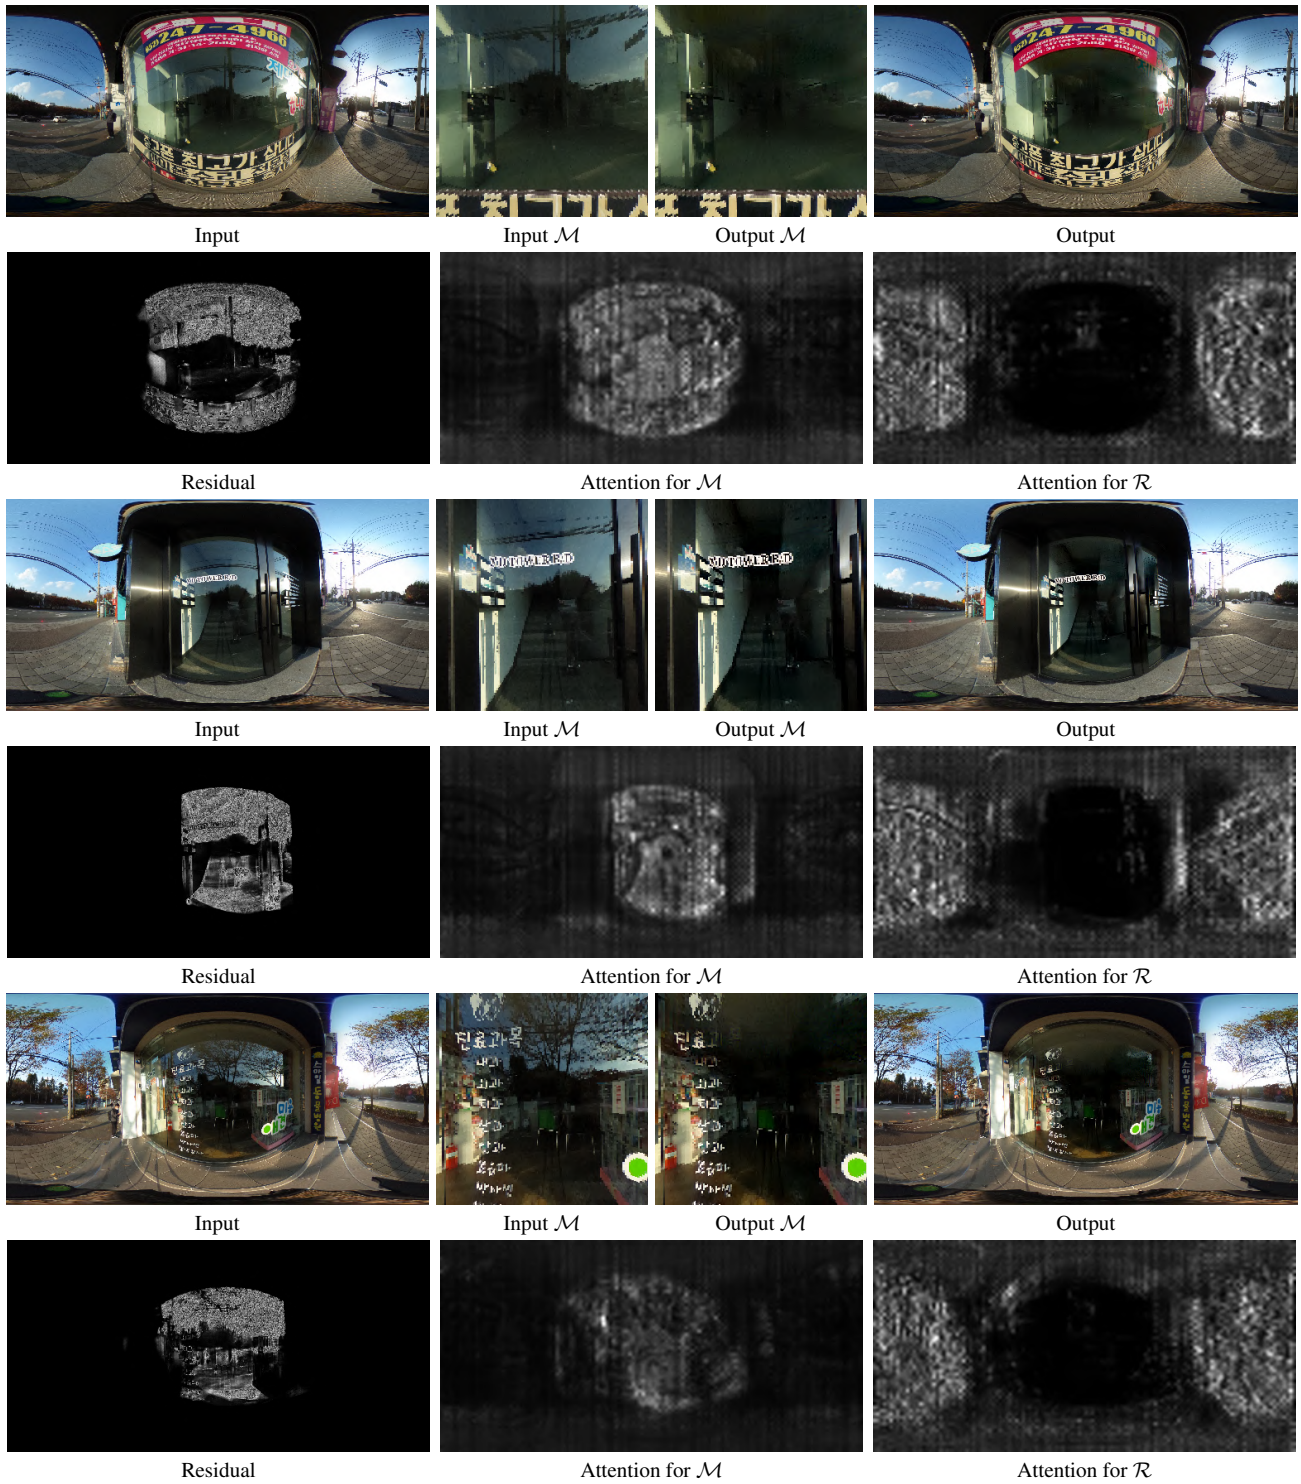

Figure S-11. Qualitative results of the proposed method.



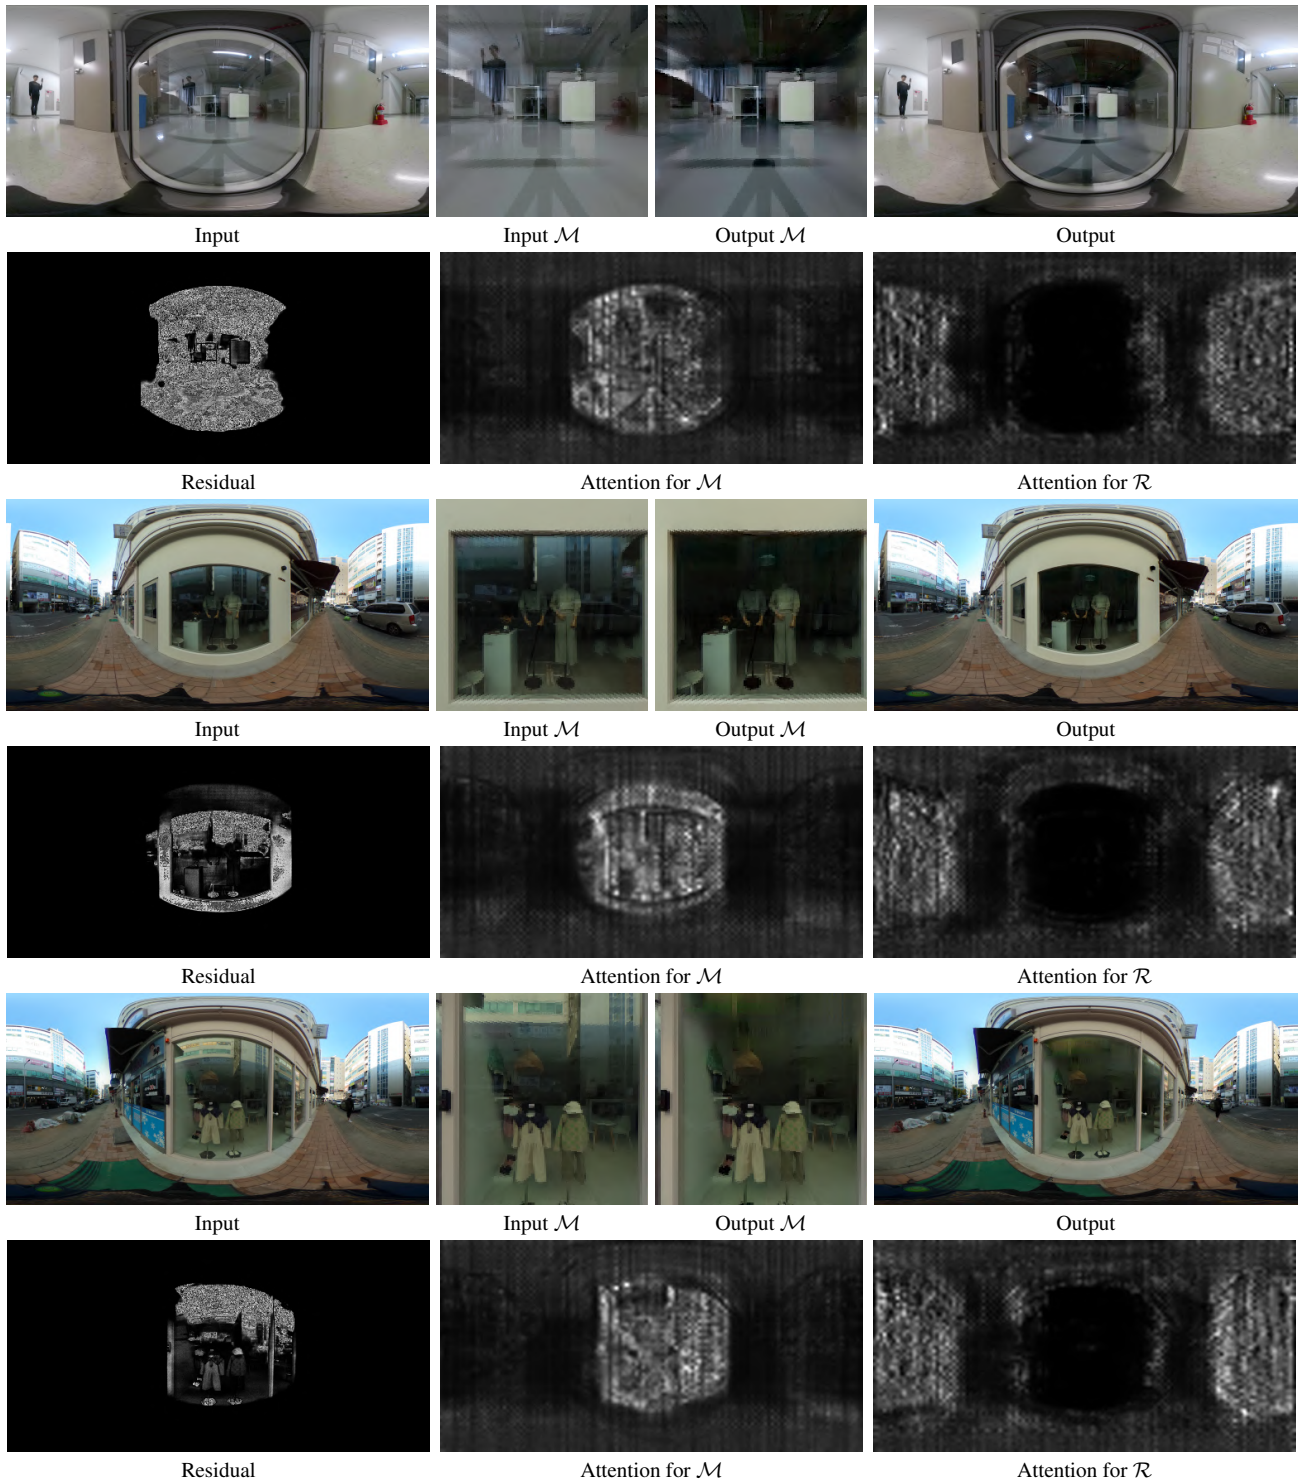

Figure S-12. Qualitative results of the proposed method.

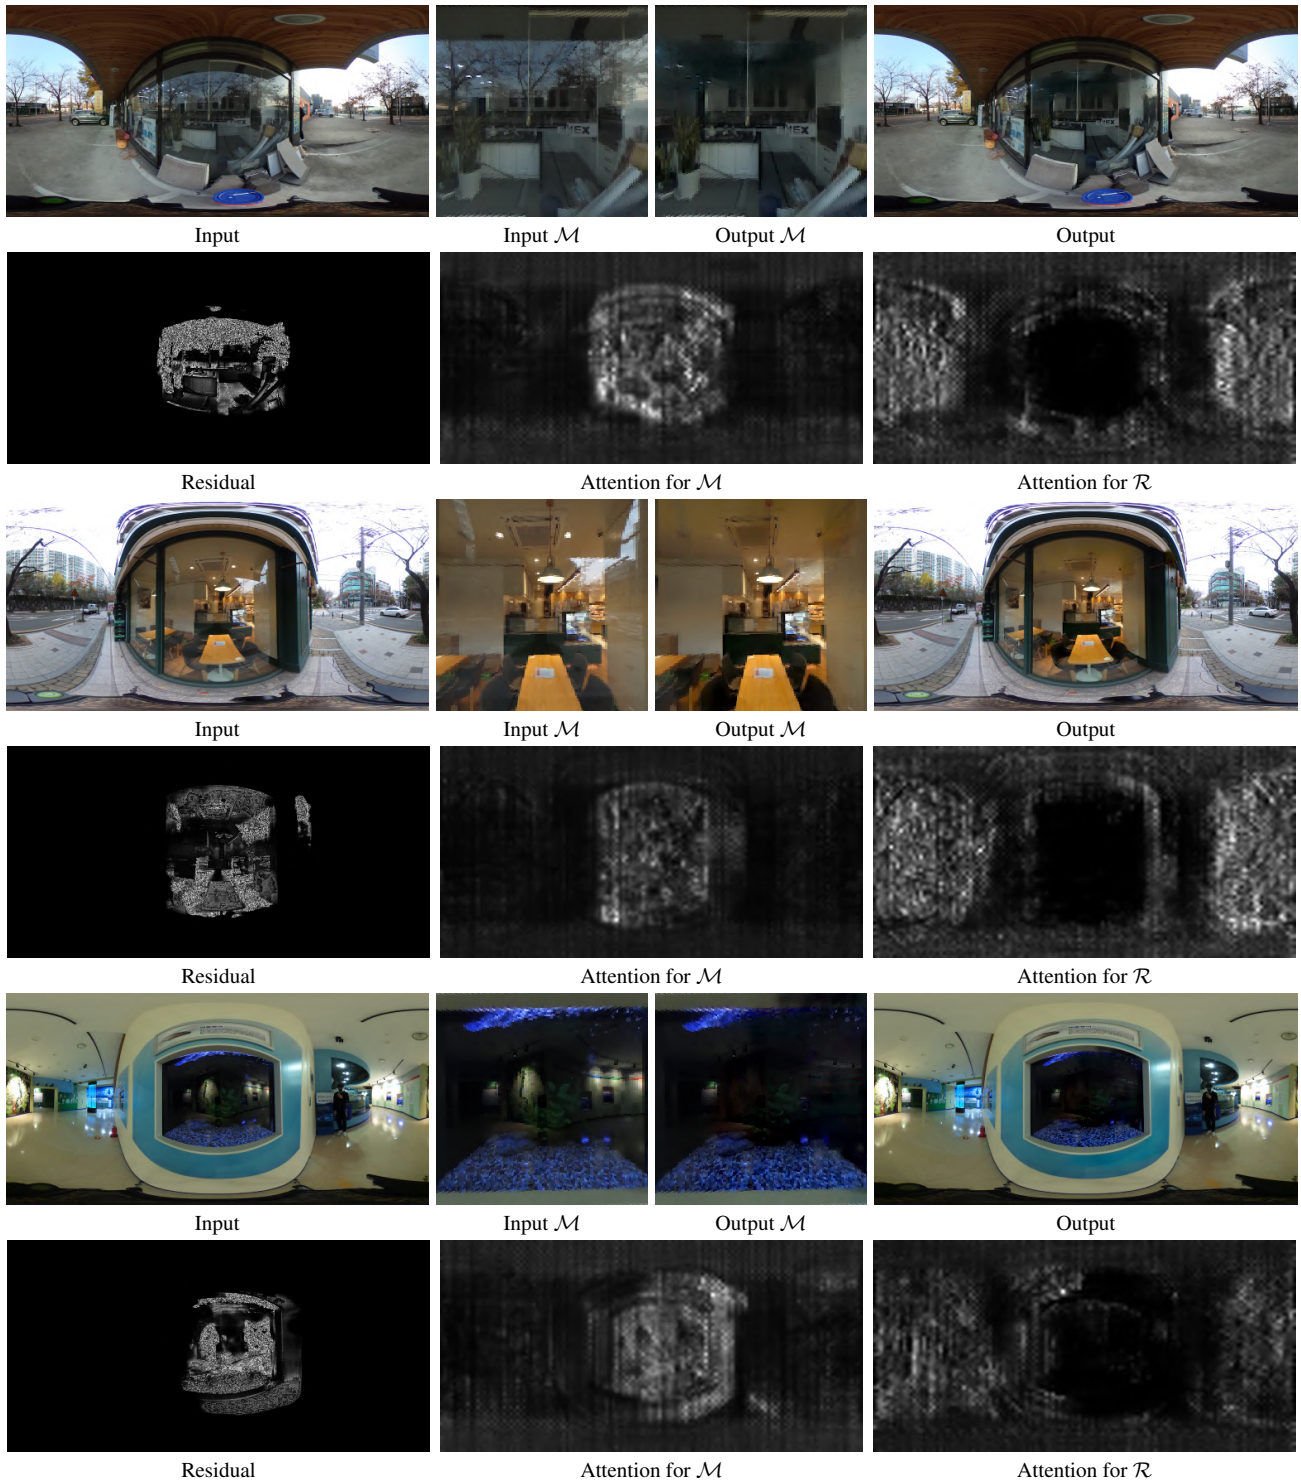

Figure S-13. Qualitative results of the proposed method.



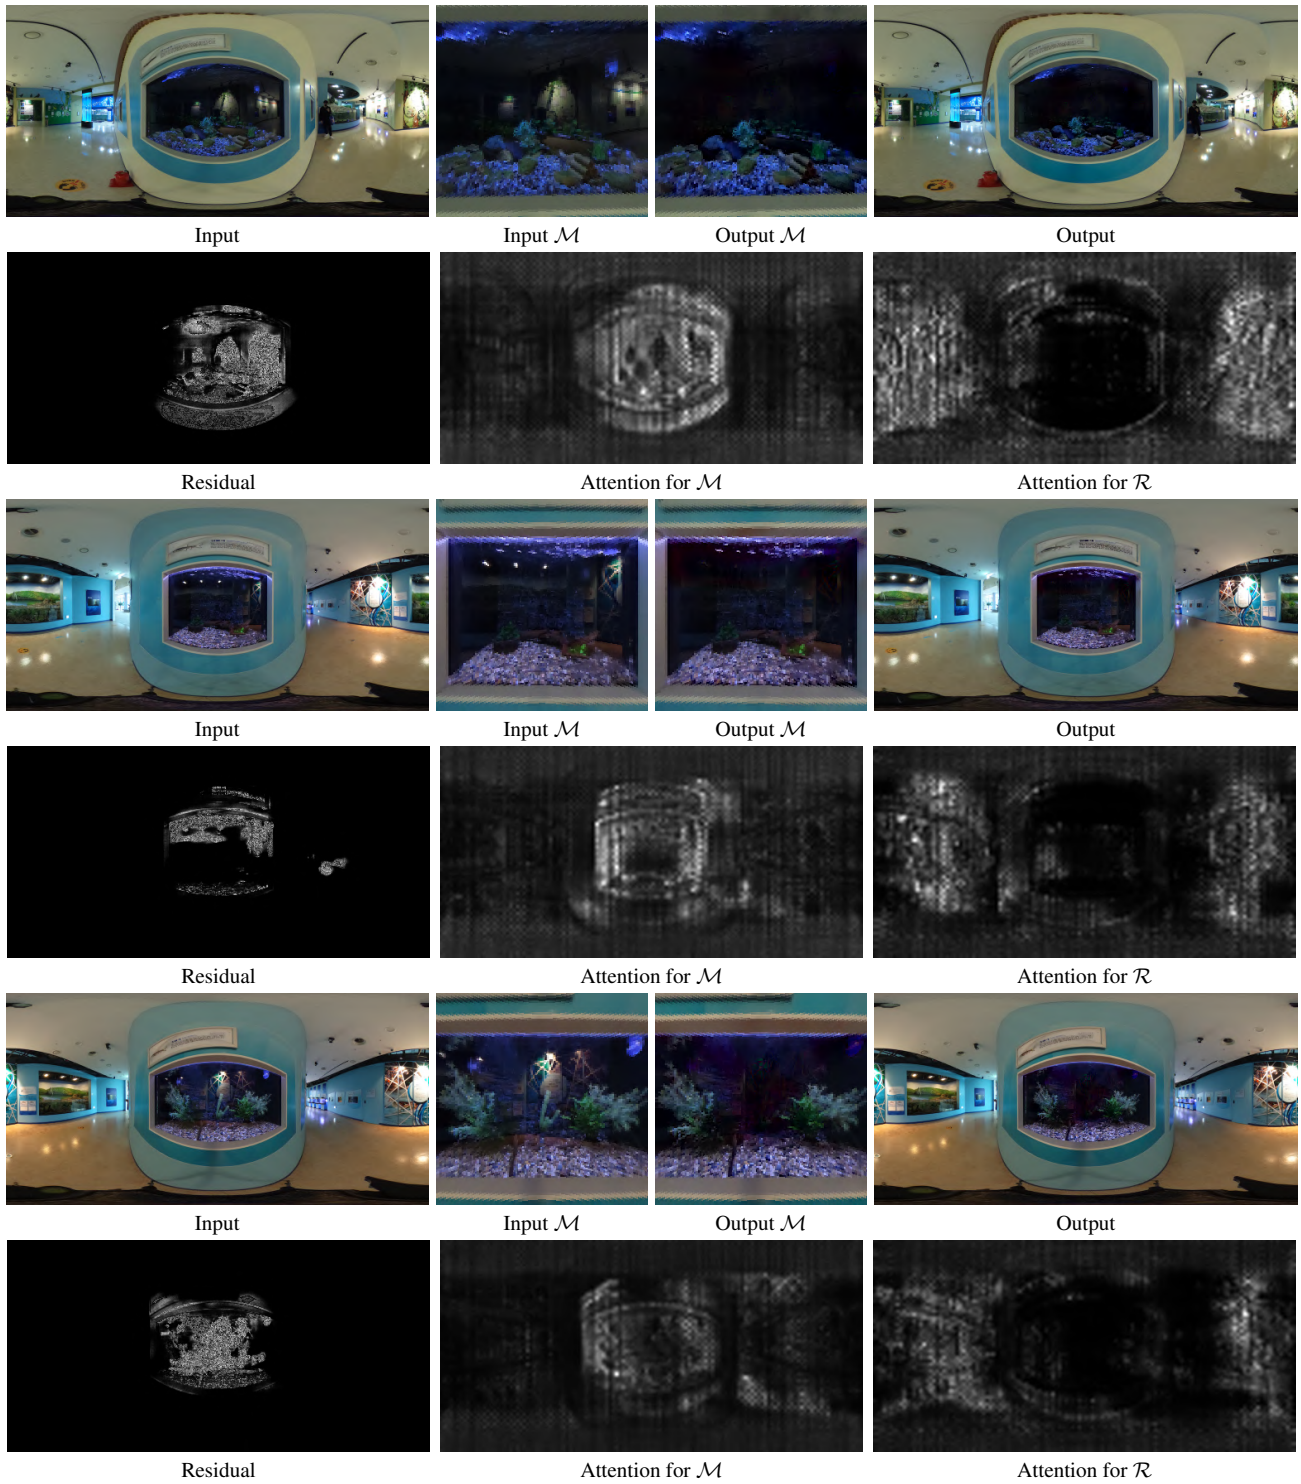

Figure S-14. Qualitative results of the proposed method.

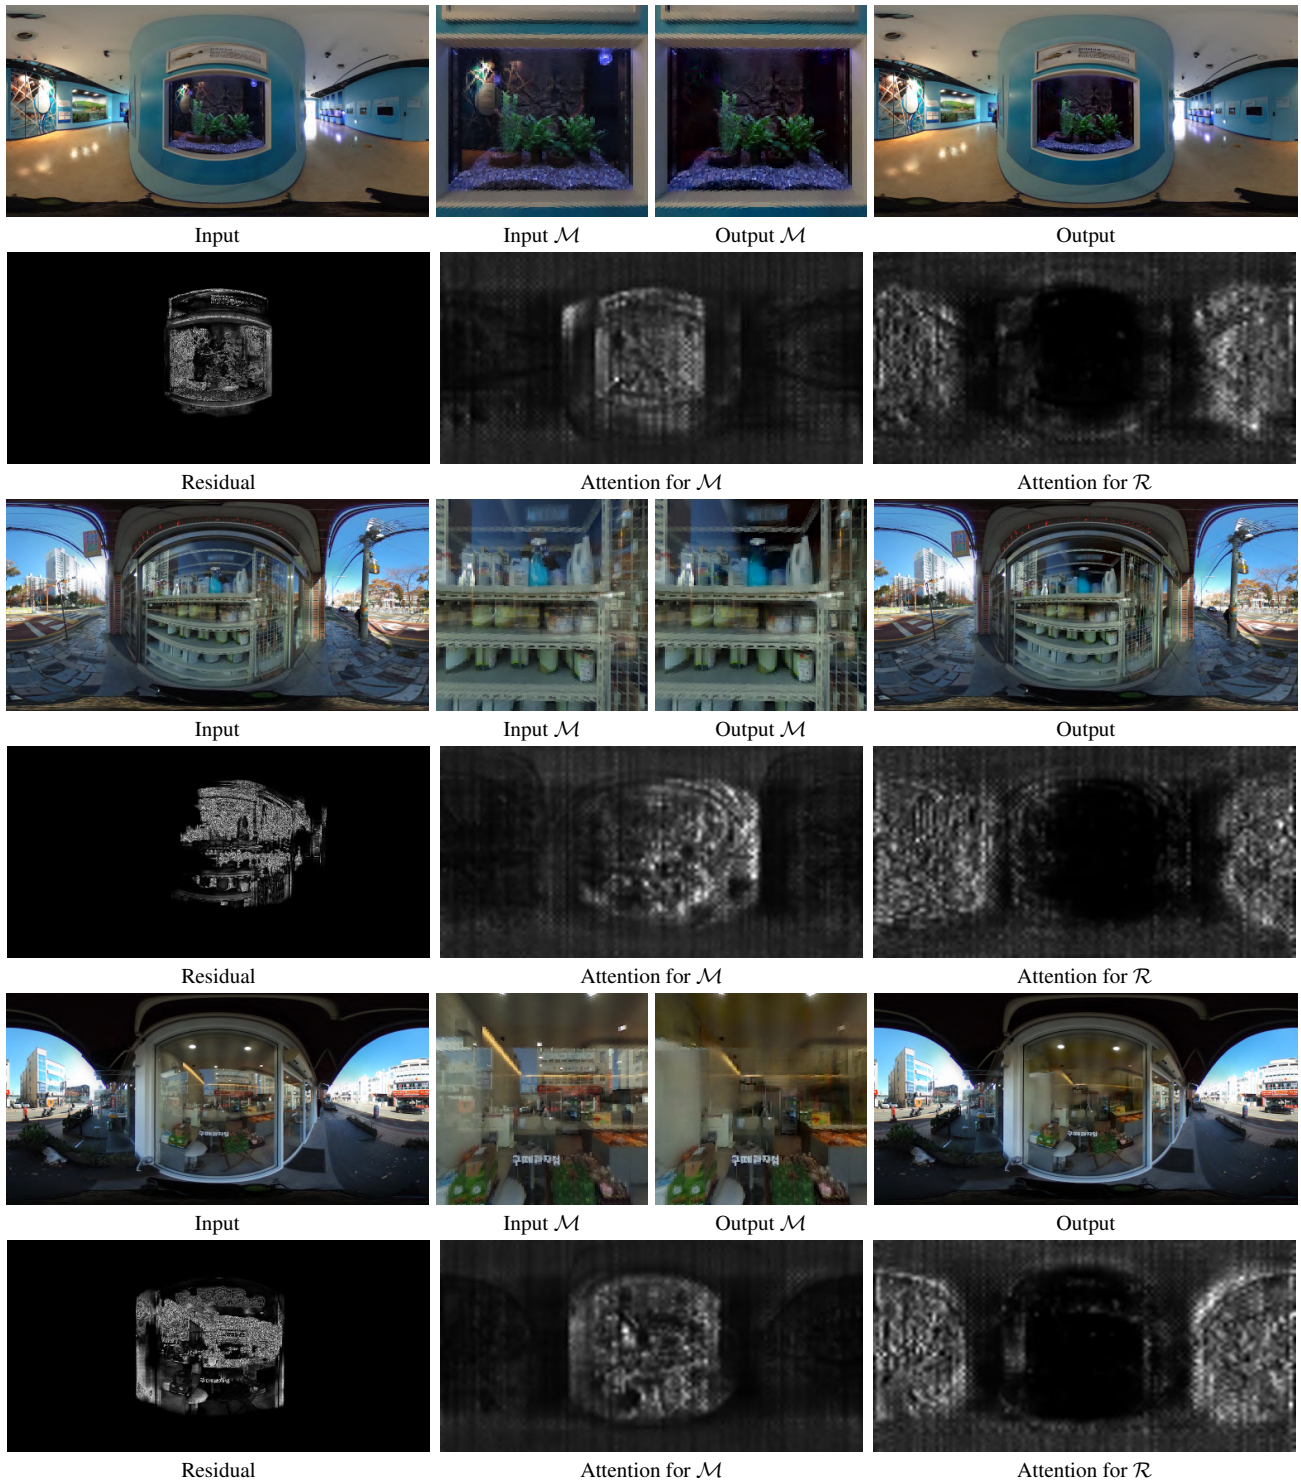

Figure S-15. Qualitative results of the proposed method.



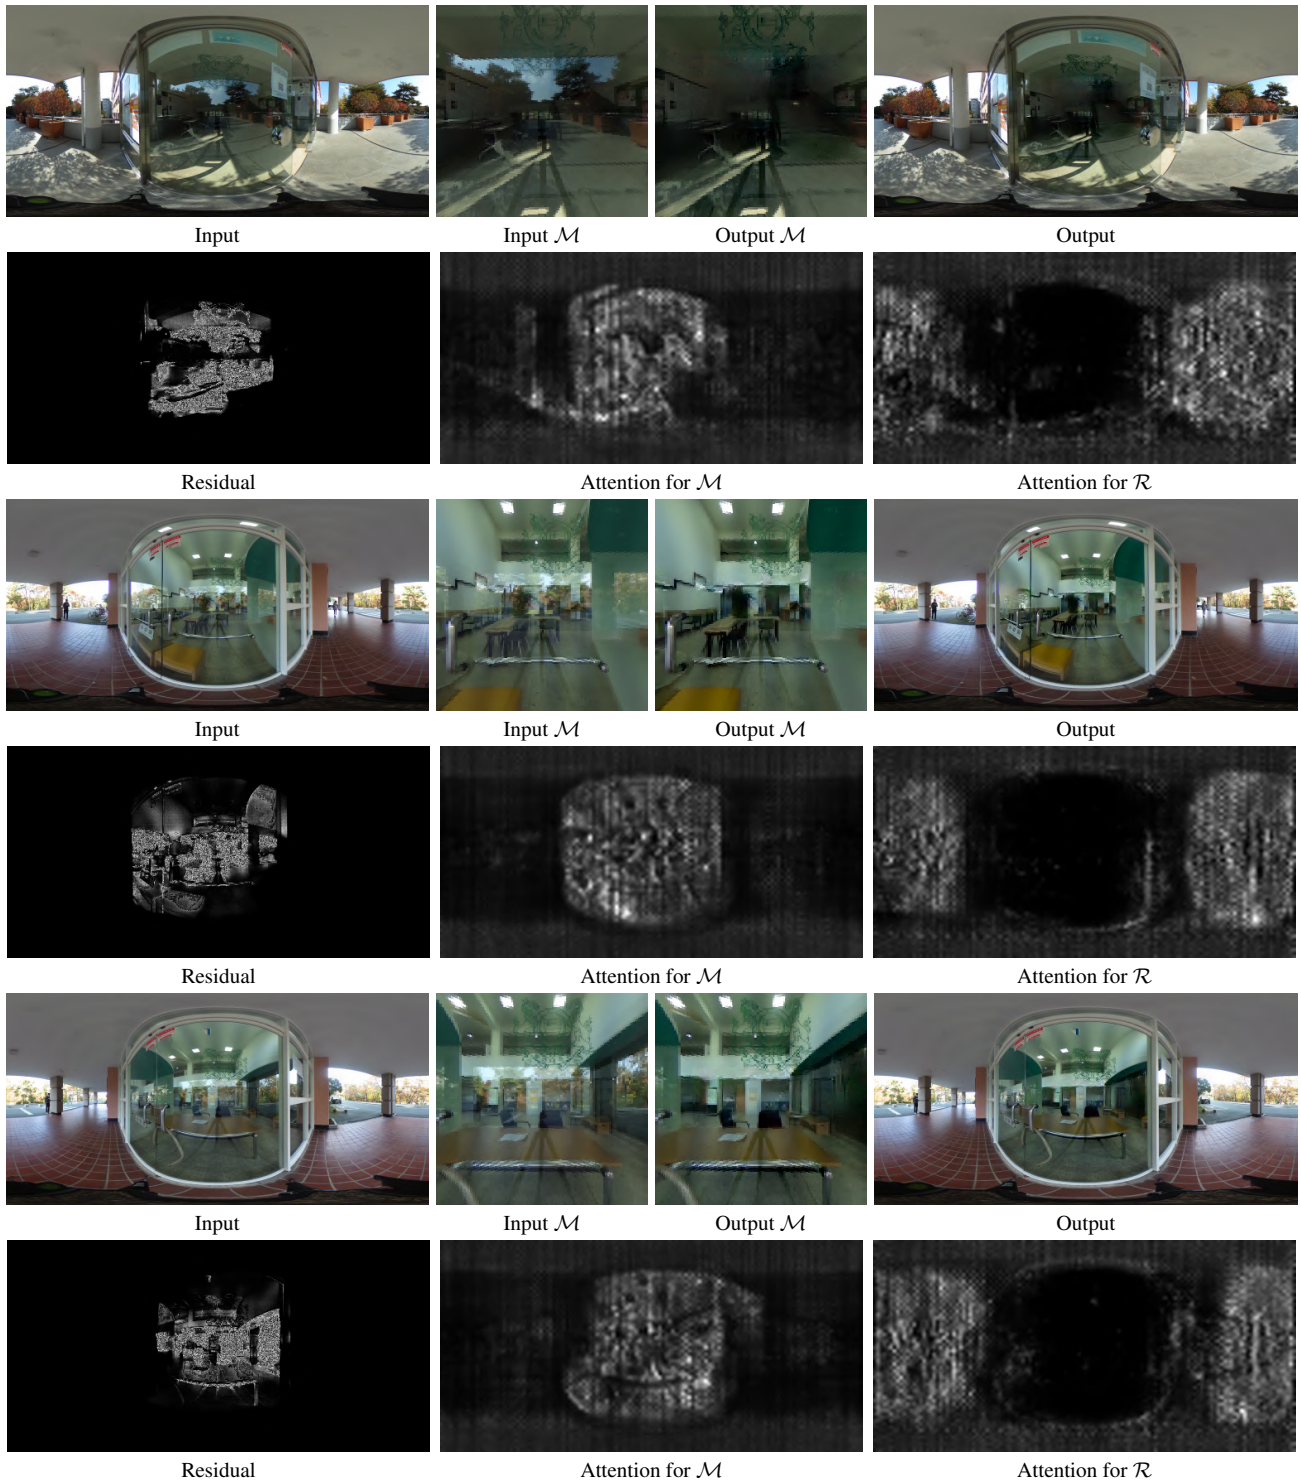

Figure S-16. Qualitative results of the proposed method.

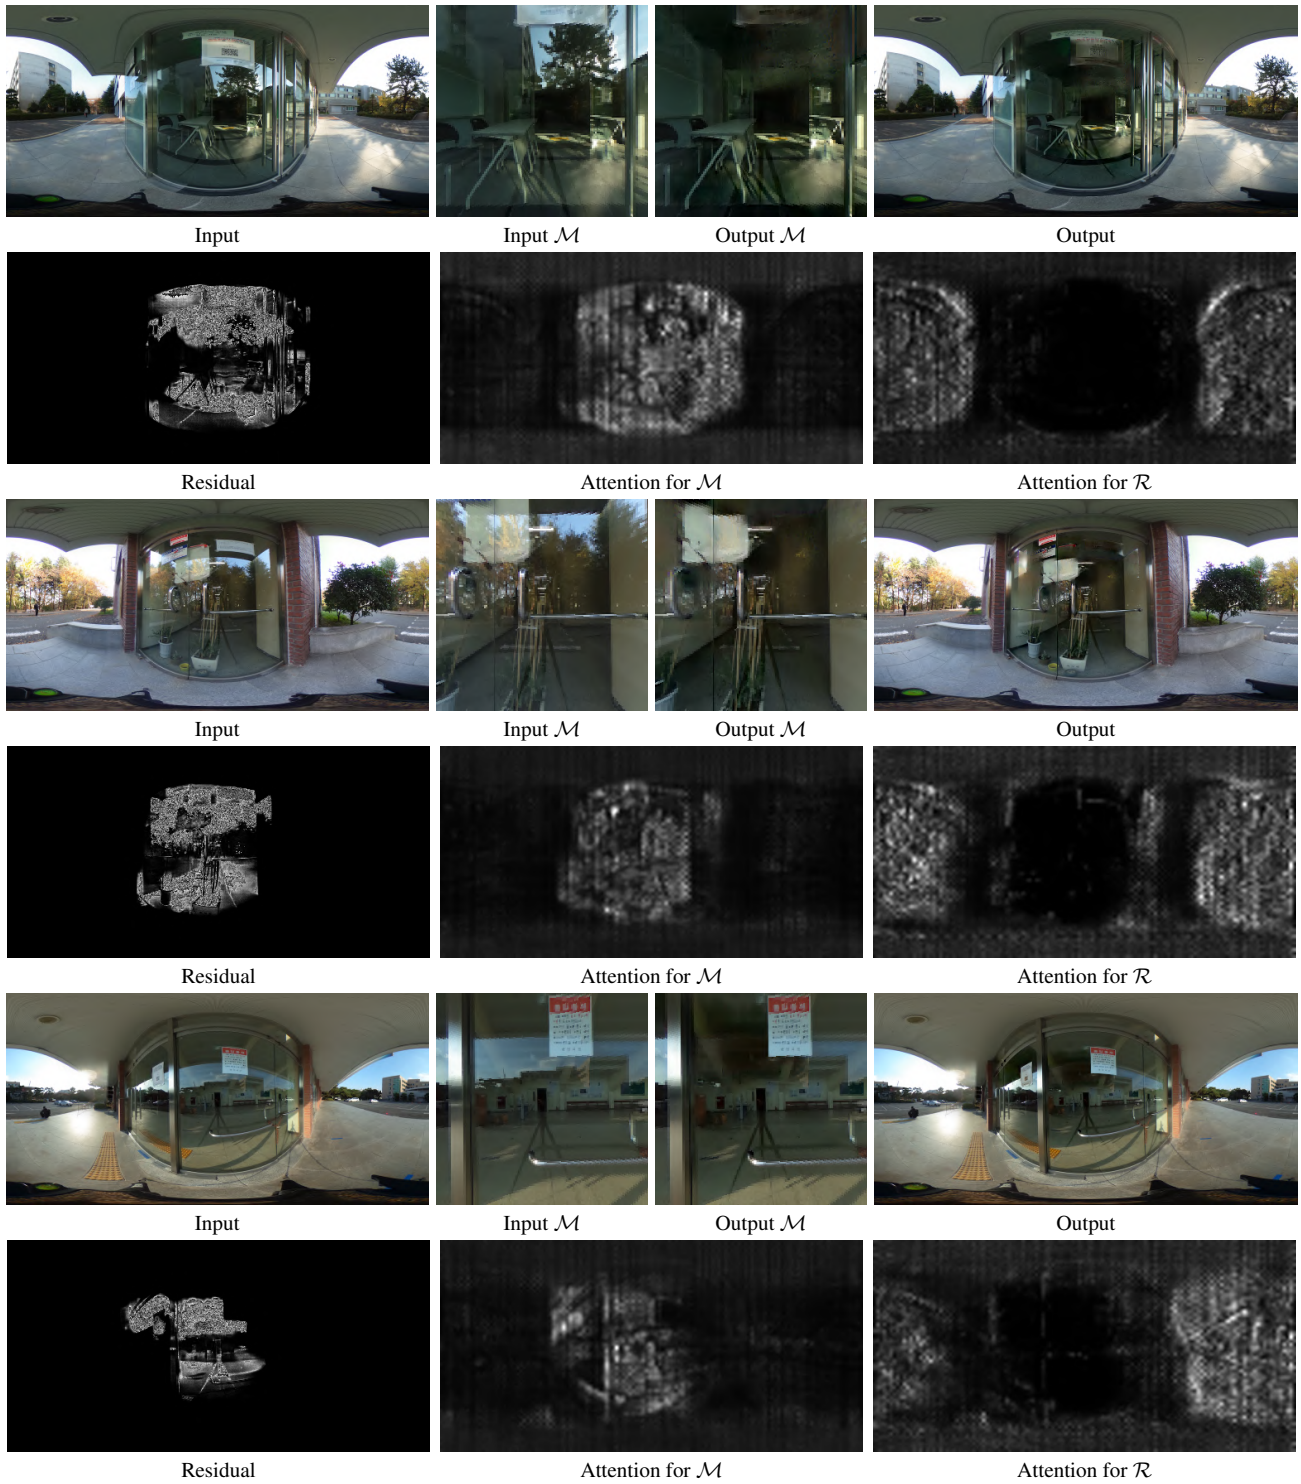

Figure S-17. Qualitative results of the proposed method.



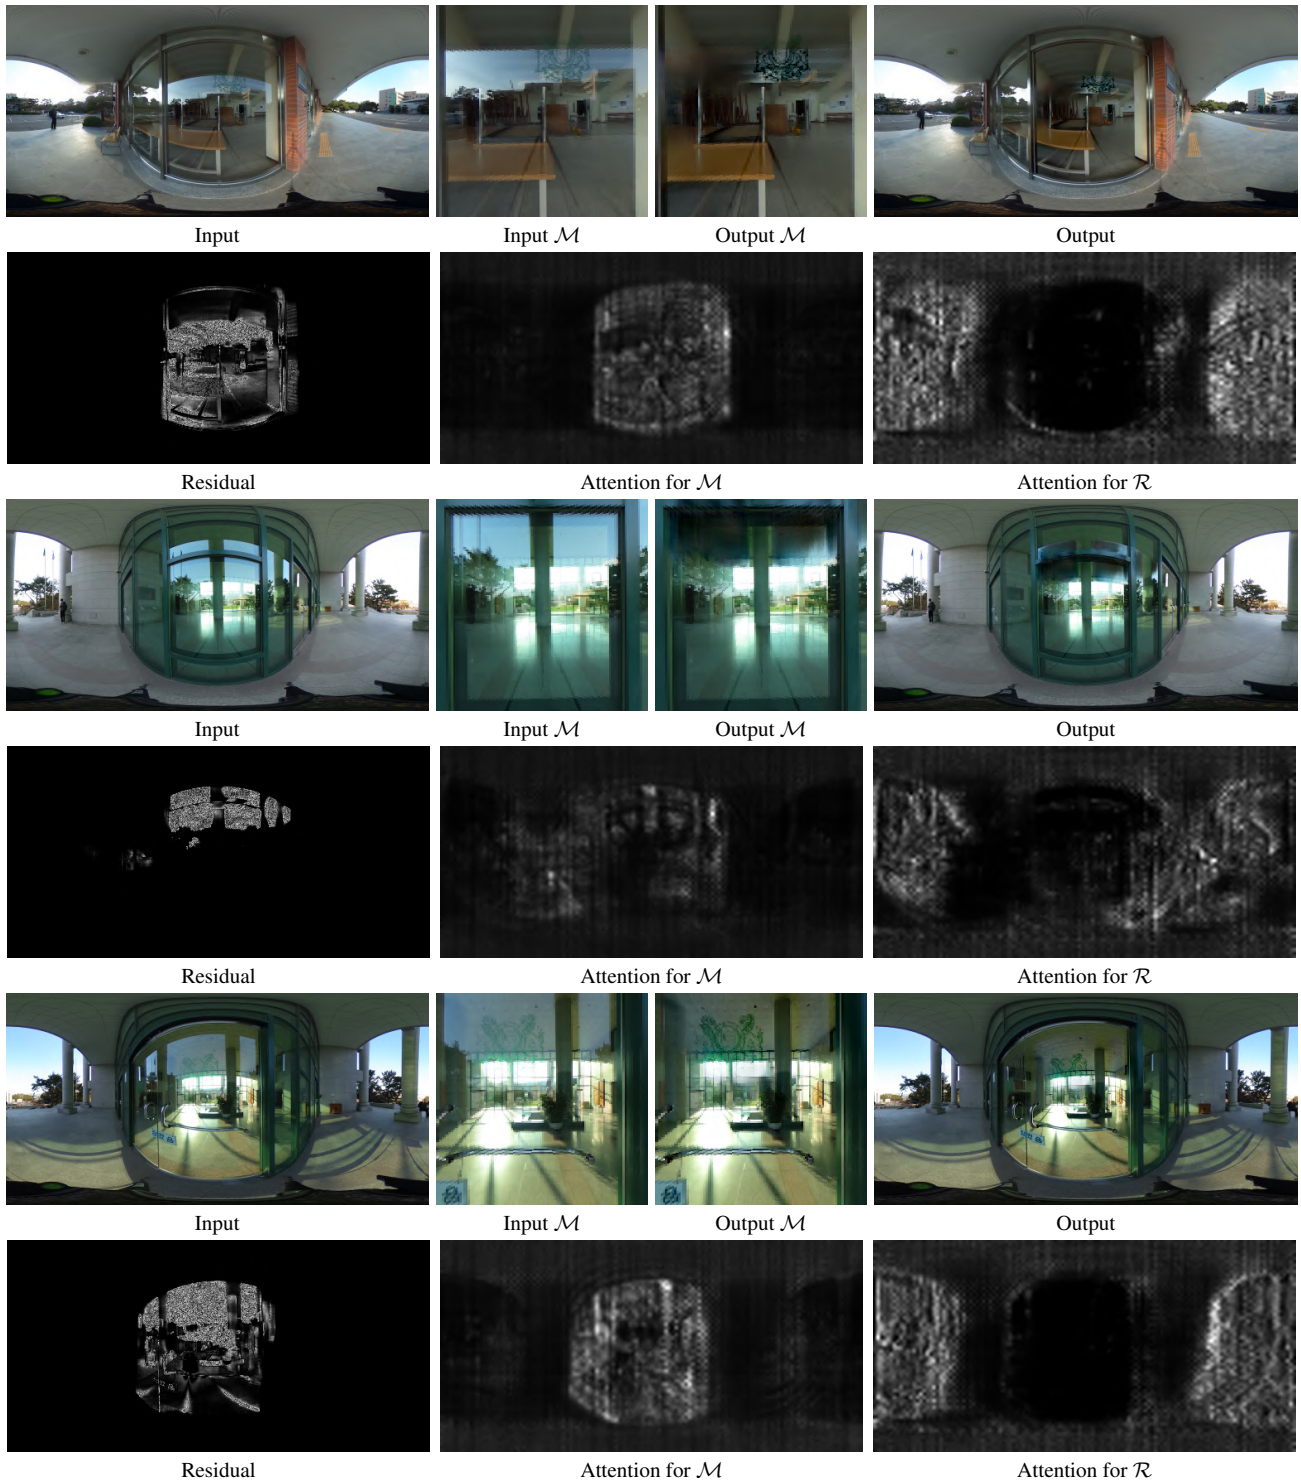

Figure S-18. Qualitative results of the proposed method.

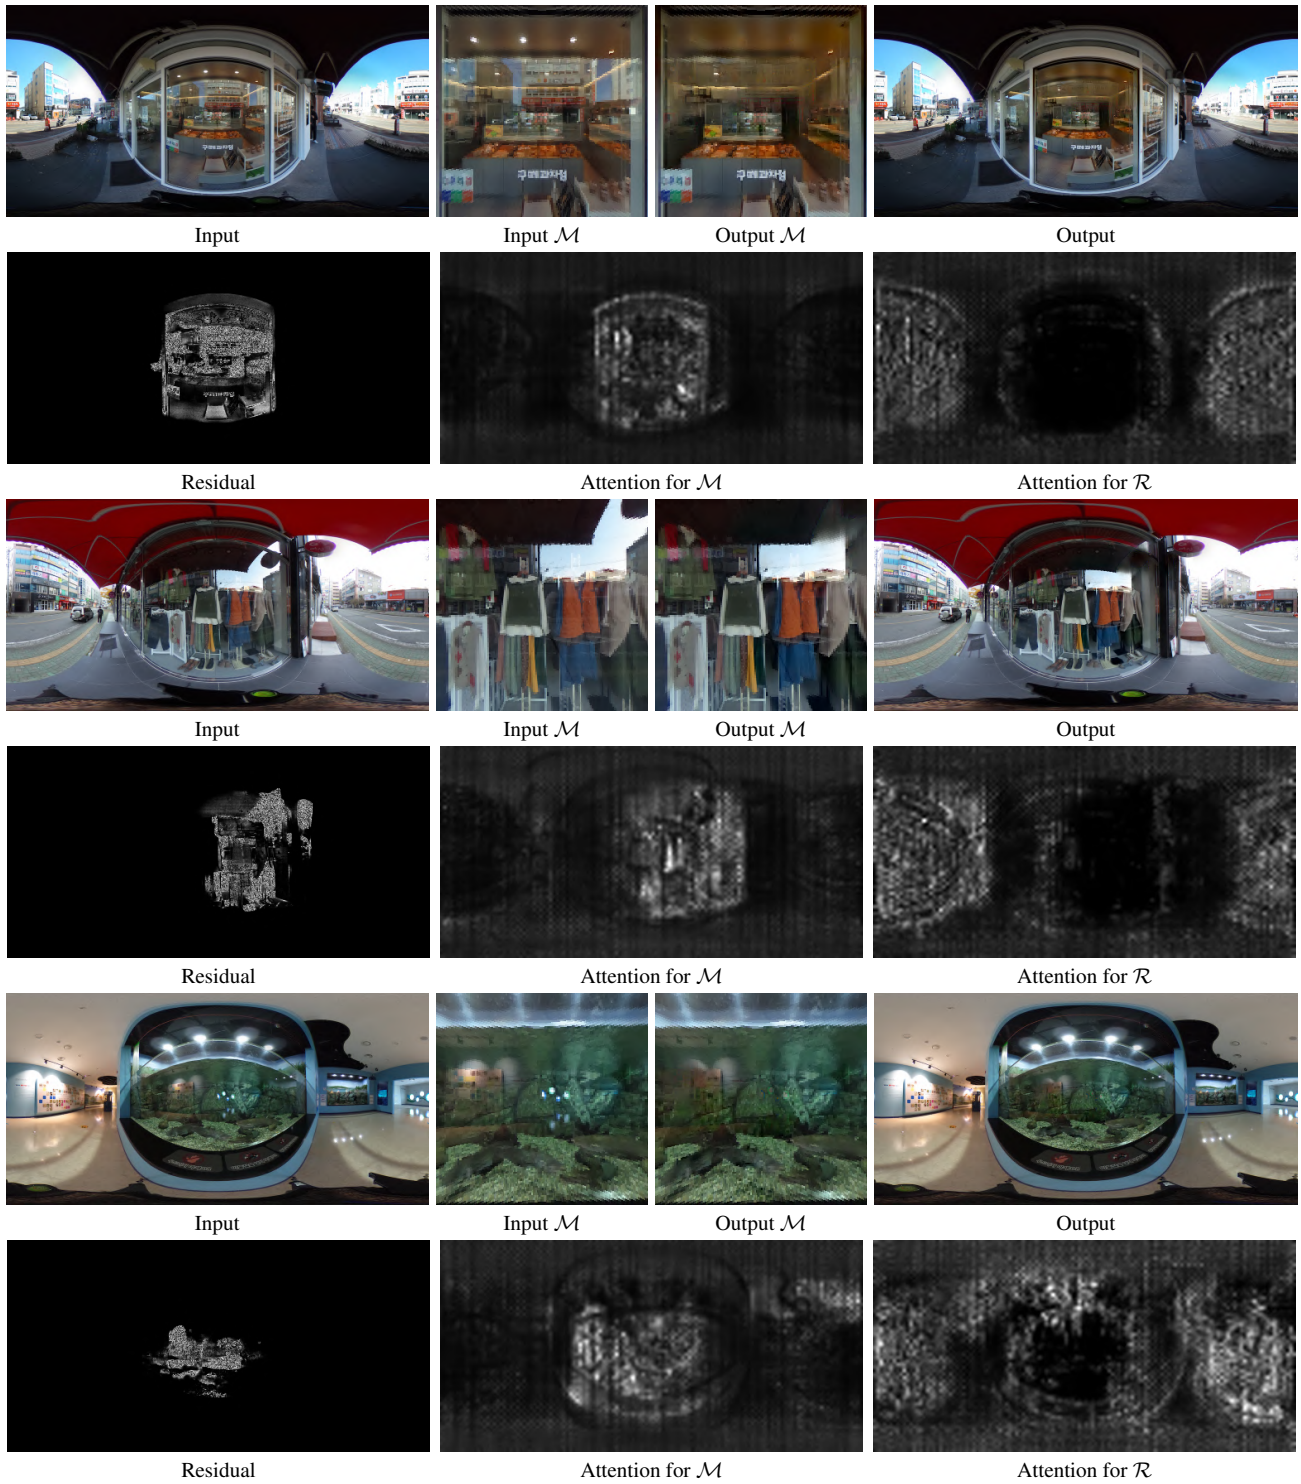

Figure S-19. Qualitative results of the proposed method.



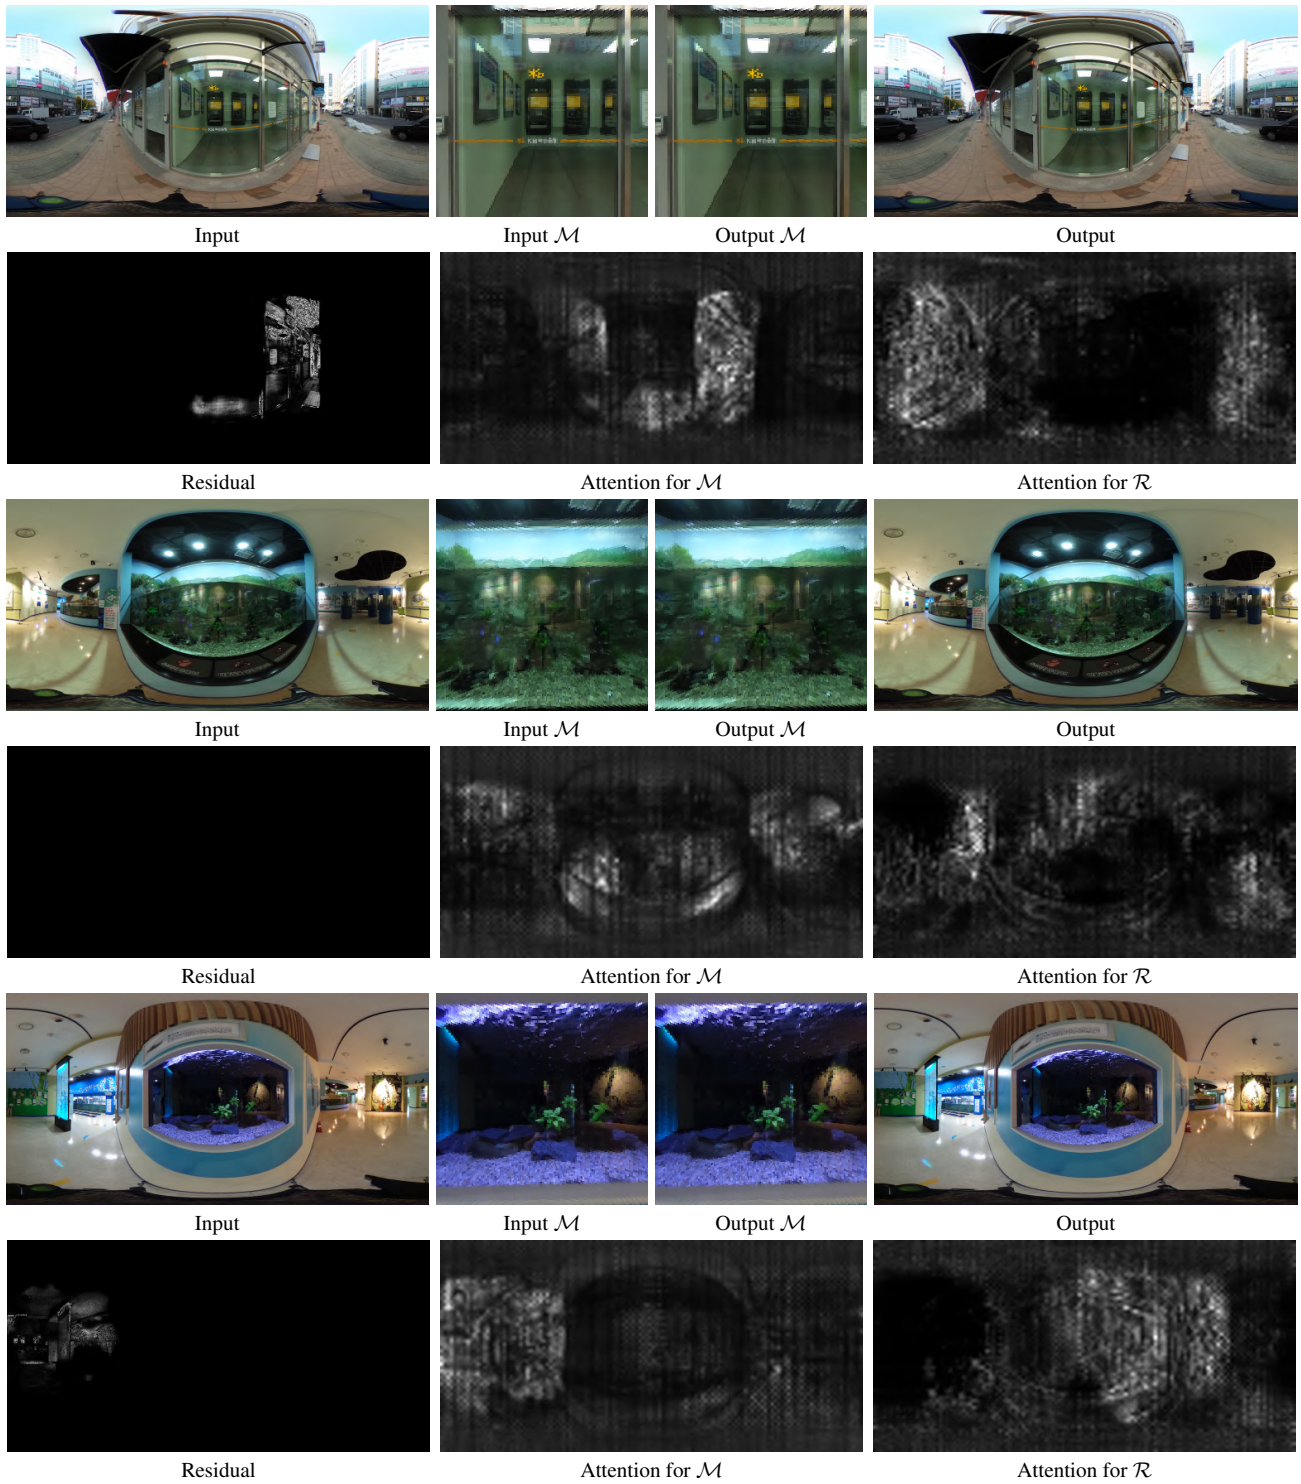

Figure S-20. Qualitative results of the proposed method.

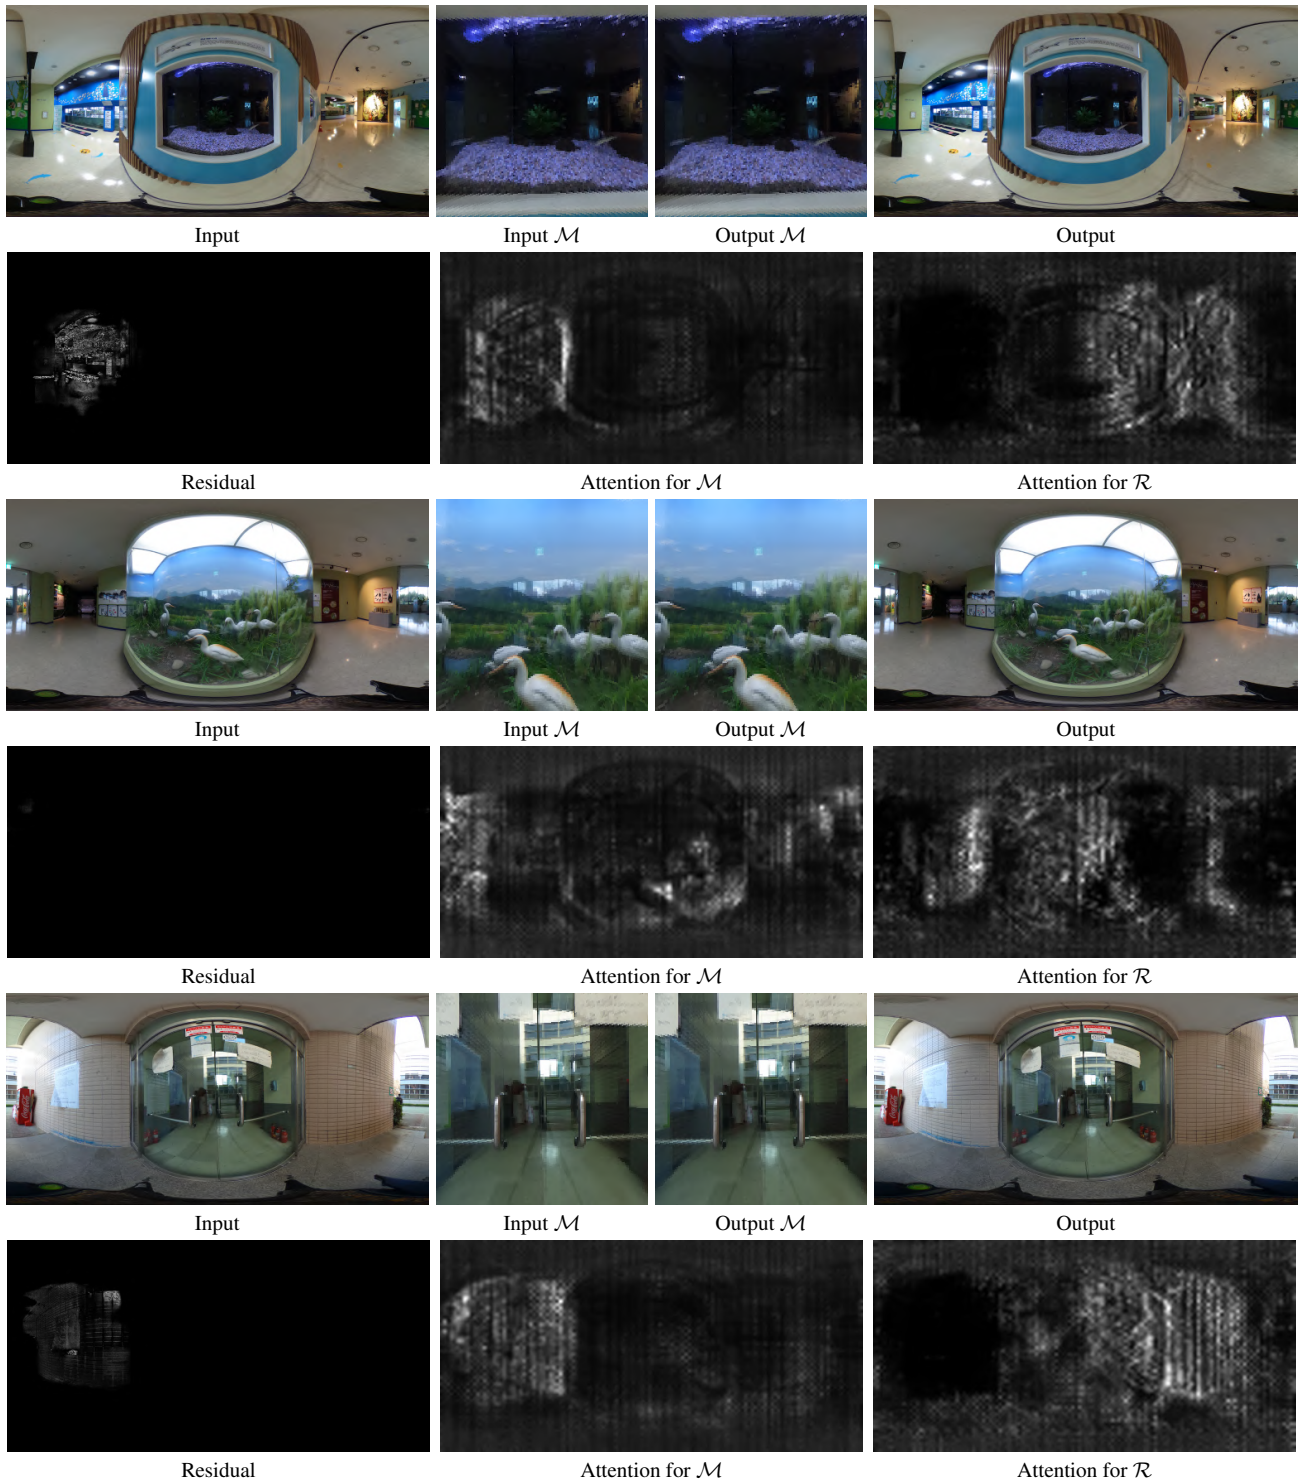

Figure S-21. Qualitative results of the proposed method.
